# Supplementary material
Source: bioRxiv or medRxiv preprint supplement (https://medrxiv.org/content/medrxiv/early/2022/11/02/2022.10.28.22281668/DC2/embed/media-2.pdf)
Supplement: Supplementary file [file media-2.pdf]

Supplementary table 2. Summary of DECONTAM results preformed with the prevalence method and a threshold of 0.5 for identification of contaminants in the dataset.

| ASV code                          | Prevalence in samples | Score                 | Contaminant |
|-----------------------------------|-----------------------|-----------------------|-------------|
| f65ef8a64333fc9aa05887b2aa16f257  | 30                    | 4.93566934530699E-35  | TRUE        |
| 8c8598245ea67244fb156b6f31192a41  | 51                    | 6.55556091875317E-22  | TRUE        |
| 4bb2a60ebd87faa796298b17bcc4ebef  | 122                   | 7.12476858009646E-20  | TRUE        |
| 6c891abaa8f2147383dd332e601800eb  | 25                    | 5.64462712512244E-19  | TRUE        |
| 073d0c62d1257a783d7508c138432fc4  | 22                    | 5.95502824269748E-19  | TRUE        |
| 609cfe075d3af9506da2e29b0db659fe  | 20                    | 8.07960447514411E-17  | TRUE        |
| 20ad5b343a158e617aa2f39adb005b6   | 18                    | 1.29146710631416E-12  | TRUE        |
| e191f1f77e171985e4ce4e16cfd52089  | 11                    | 1.13823341316519E-11  | TRUE        |
| 39032f4b6765815d5012773e6807e4be  | 14                    | 1.98170460521423E-11  | TRUE        |
| d65886bee0f292fbbf5fc64ff1bc0b24  | 221                   | 1.6692749528622E-10   | TRUE        |
| fd657e81a8537d9ff329c0703a07f763  | 10                    | 1.72962979000839E-10  | TRUE        |
| 20cbb7a8b00c1670d0175f2d742e655b  | 9                     | 2.52133562311872E-09  | TRUE        |
| 217791e2b9f75aa3915ad540e35c3612  | 13                    | 1.0669565420676E-08   | TRUE        |
| 54be6aa07bc71272df30483327e7f0cc  | 6                     | 7.05006830680515E-08  | TRUE        |
| fd2b0b0983f5c7a61e3117545344180c  | 12                    | 1.19572186337503E-07  | TRUE        |
| d23fbef2f31d48eda40876cdbc49933a  | 194                   | 2.32906586692203E-07  | TRUE        |
| 574d164310944193d8fc13dc10346e58  | 45                    | 3.99850620766581E-07  | TRUE        |
| 1db319dd24afdc2890163fd4cfd776e0  | 7                     | 0.0000004703898033813 | TRUE        |
| 8fbb45639f32c85085e06660994f7ae   | 7                     | 0.0000004703898033813 | TRUE        |
| 083310805ab3a26fd0b20219868d894b  | 10                    | 4.78885615151771E-07  | TRUE        |
| 11f63e800d538ce61113253faf0f0363  | 10                    | 4.78885615151771E-07  | TRUE        |
| e15cb616bbf94e116f873ba1b50aabc   | 10                    | 4.78885615151771E-07  | TRUE        |
| ed7a396f4b38c1b98b597e923ae53f22  | 5                     | 1.04469193996803E-06  | TRUE        |
| e941a4a1ad9617d44833702de4f0ca82  | 5                     | 1.04469193996803E-06  | TRUE        |
| 2bbd06be7ee1e2cef688d5d3b880053f  | 5                     | 1.04469193996803E-06  | TRUE        |
| fca9741d7bcd137ad78a45a0f50c3b6   | 30                    | 1.36535722961629E-06  | TRUE        |
| 5785bb04044f25bd01768aa97d019b2e  | 8                     | 1.79321917846439E-06  | TRUE        |
| 8f09bac714c02dc9415770271349dc99  | 196                   | 1.80482872811538E-06  | TRUE        |
| 77c55b0f6c379835576843f02171325   | 17                    | 4.57816661895207E-06  | TRUE        |
| 05592ceac1f1697c9020de02157cec66  | 6                     | 5.9861489078024E-06   | TRUE        |
| 1187d3f6bbc3c560b79f47cf9ad873bd  | 49                    | 9.12411188077238E-06  | TRUE        |
| c7ef526f7263c4a3683d096b748a0fb   | 4                     | 0.0000150558544296955 | TRUE        |
| 98bc1ec29a4c0f9bf70d7bfa48a48b6   | 4                     | 0.0000150558544296955 | TRUE        |
| 1ea83794b96a00695927de44a90aa26d  | 4                     | 0.0000150558544296955 | TRUE        |
| d8f298ecc87fa0854033cac0ce4baca   | 4                     | 0.0000150558544296955 | TRUE        |
| 9ab98702e9cf7c27aa339109ea3e689   | 4                     | 0.0000150558544296955 | TRUE        |
| 57ef5006312a9662d87d57c1404c1a87  | 7                     | 0.0000200061185749385 | TRUE        |
| 548c3f420c3c6a1eb10f35aed1be00c1  | 7                     | 0.0000200061185749385 | TRUE        |
| eefaf42aa3481703873ea5b975cca9bf  | 15                    | 0.0000200562316647648 | TRUE        |
| 6ba560a76661744bc65eed04953c1314  | 5                     | 0.0000721451963282275 | TRUE        |
| 7f1487c191bfa6ccc9085821aadf4324  | 65                    | 0.0000897630873541179 | TRUE        |
| 891019e319f5d8d088ed4f9379f63ef   | 208                   | 0.000164834348740025  | TRUE        |
| ec9d0f20c8c61eb5032d07937cf1af3c  | 6                     | 0.000207385864939935  | TRUE        |
| 0a738d348f5e152a2521b6eb922ef446  | 6                     | 0.000207385864939935  | TRUE        |
| 365bc413ed3cf82d873793b5581c3cc   | 6                     | 0.000207385864939935  | TRUE        |
| 791ca5935b55de1be66b9c83d56e4167  | 3                     | 0.000211212129284659  | TRUE        |
| c873733a1c472c123f8063297a02c773  | 3                     | 0.000211212129284659  | TRUE        |
| 42a8ef3012c07a08d6fbaaef0273cbb   | 3                     | 0.000211212129284659  | TRUE        |
| a20597397ea624f1d40736bb973dfff1  | 3                     | 0.000211212129284659  | TRUE        |
| ee02b9d7321d96af270ccd201ba17b6b  | 3                     | 0.000211212129284659  | TRUE        |
| 048633e2cfb6cd41a06beacf26f04cb6  | 3                     | 0.000211212129284659  | TRUE        |
| 6fad82ce33939380ddb960da7f411c1   | 3                     | 0.000211212129284659  | TRUE        |
| f075744cdedbbbec727c7e1b2037c3e6  | 3                     | 0.000211212129284659  | TRUE        |
| 30554407069b2367b77ee68c1982db14  | 3                     | 0.000211212129284659  | TRUE        |
| b2bba50ae5022b13d0cd6641814e0713  | 3                     | 0.000211212129284659  | TRUE        |
| 79544aab951bcf5f54f663c1dc3f2912  | 3                     | 0.000211212129284659  | TRUE        |
| b83aaa7e85c9c03fa9485e12be27116b  | 3                     | 0.000211212129284659  | TRUE        |
| e58f4afd38d5d2317e576701eac632a4  | 3                     | 0.000211212129284659  | TRUE        |
| 8d3565638a5a89a00aa3233b2b027489  | 4                     | 0.000814736808279286  | TRUE        |
| 7bae376e41b6259952179d259f069c1e  | 4                     | 0.000814736808279286  | TRUE        |
| 5b84f9aefbea73054bcb5ebbf3904893  | 4                     | 0.000814736808279286  | TRUE        |
| a8a7c72cd7f5319290396ea098c97020  | 4                     | 0.000814736808279286  | TRUE        |
| e6f6be4ccfb278fe562ca7dffbe543652 | 9                     | 0.00153092250680292   | TRUE        |
| 32cfd0837255fb3842fc282e432ec52   | 9                     | 0.00153092250680292   | TRUE        |
| e795fed13ead27da7c3bedd15b4a59c1  | 5                     | 0.00196365213243004   | TRUE        |
| a5e3cfb18eb2fd335108bf5b8d60b739  | 5                     | 0.00196365213243004   | TRUE        |
| d62009c3d7662c9c54d23242713f314e  | 2                     | 0.00288656576689034   | TRUE        |
| d5695af3afad7256ad94ba6a38ccd4fb  | 2                     | 0.00288656576689034   | TRUE        |
| e2fcc92ed4f145071525b58f2f750e39  | 2                     | 0.00288656576689034   | TRUE        |
| e55f7fddc508fc02e0ce54bfb21e6038  | 2                     | 0.00288656576689034   | TRUE        |
| 7fa99bd3ee34c6d339e3ff01bd88427e  | 2                     | 0.00288656576689034   | TRUE        |
| 0eb8e63cb8f7cb7aa58b403dc29da7de  | 2                     | 0.00288656576689034   | TRUE        |
| 464a52deb6e8c4e2b57d980a8d18f04c  | 2                     | 0.00288656576689034   | TRUE        |
| 2d34c22edce4b1f2d8a5228ad78f8ea8  | 2                     | 0.00288656576689034   | TRUE        |
| 6a9e6cd156ec3e7ca51f4912bfe49614  | 2                     | 0.00288656576689034   | TRUE        |
| da8b2afed60ab7f62166e969e4322f11  | 6                     | 0.0037851032560835    | TRUE        |
| f92c2786afd33f8c9eddd65bcb666f42  | 18                    | 0.00487193302555845   | TRUE        |
| 50a3b56e0b7db75ee9daccf7a751ba41  | 19                    | 0.00630479812169273   | TRUE        |
| 84716245f53ab2236b84538a9cdd74ed  | 7                     | 0.0063823686613895    | TRUE        |
| ed2e115df9ed4a9cf8de15df330c428e  | 262                   | 0.00647182724575958   | TRUE        |

|                                  |     |                     |      |
|----------------------------------|-----|---------------------|------|
| cfeb33d30aa1b73ecca815bc65ff35f0 | 3   | 0.00844848517138625 | TRUE |
| 038cda24080464defef44077e55d614a | 3   | 0.00844848517138625 | TRUE |
| 1772eec427522cda596e760ad3ebef61 | 3   | 0.00844848517138625 | TRUE |
| a5d1217aa1cbc154c499796f9040d954 | 14  | 0.00977619312112795 | TRUE |
| 6628b08e13117c52417f5dfce4d9eafd | 8   | 0.00983688431712284 | TRUE |
| b4587918bfe7955deb4fe9932ec07c3d | 4   | 0.0164745460842033  | TRUE |
| 2ce83ce8633190af0e5f51af6c6d7da8 | 4   | 0.0164745460842033  | TRUE |
| 31de871bad103340eaac73b2383506fe | 10  | 0.0195459279544366  | TRUE |
| b57744bd30af9f7a4d538d0aba27596b | 11  | 0.0258714571922254  | TRUE |
| d50706f84ad2be04b147f0a3b36039d3 | 5   | 0.0267556257599366  | TRUE |
| 1fa7e42cad8192ac5a0f3e2319fb1089 | 5   | 0.0267556257599366  | TRUE |
| 7b922bd11ea3f2de8a1d01bc0314871f | 438 | 0.0311556538676718  | TRUE |
| bc3d8f06abbe8f3820be7ab8cc2eb279 | 6   | 0.0390864277175264  | TRUE |
| 0d57a518ec5291ce0ee0643456940a90 | 38  | 0.0399684744186126  | TRUE |
| 1369aba02dd8b749b4c4c2a799d34207 | 13  | 0.0415311220541261  | TRUE |
| 107aa7e6b56274803bffd1ccff5b2ee6 | 14  | 0.050854414641935   | TRUE |
| d353248c8a7d31bc9f8378a320b77924 | 14  | 0.050854414641935   | TRUE |
| 8bc54d575f88d09b2ba16b7f571812ae | 31  | 0.0517381435573177  | TRUE |
| 6ba7d4f61fd8143e8aa856596c09b9dd | 7   | 0.0523669077242673  | TRUE |
| 4908017090823380efa89d3e236c811e | 33  | 0.0655854886123842  | TRUE |
| dc8201773df81f21b280e07af320208  | 8   | 0.0691034263704471  | TRUE |
| 1ea779464fee4aab61b2adbe93db1d13 | 8   | 0.0691034263704471  | TRUE |
| 7bfaa7f90dff6c876675062e176f2b47 | 8   | 0.0691034263704471  | TRUE |
| 4dd2f7772c7e05fe793cb8d593a59dd0 | 8   | 0.0691034263704471  | TRUE |
| 642137de3ea503ff59288deb908c51fa | 8   | 0.0691034263704471  | TRUE |
| aeb091a4d196e216c7ed9c8cc29f36a8 | 8   | 0.0691034263704471  | TRUE |
| 67cea148133734a4183fb020f6740b4e | 2   | 0.0769230769230769  | TRUE |
| 83e8f941ebfaf966ed1b7d81e21e43a6 | 2   | 0.0769230769230769  | TRUE |
| 403c354ef8601d5aba74b7ee78058e87 | 2   | 0.0769230769230769  | TRUE |
| 0d3f7fbbeccd21fbb5aa31e55f638069 | 2   | 0.0769230769230769  | TRUE |
| 508b4814a200ebb7843f78be4251e05  | 2   | 0.0769230769230769  | TRUE |
| 3caf30133a391f2f85e2365d24923375 | 2   | 0.0769230769230769  | TRUE |
| d630cbac6a5674e8efe19b8a32751f57 | 2   | 0.0769230769230769  | TRUE |
| 65dfa12d95100cd914a50aa14ab0c74e | 2   | 0.0769230769230769  | TRUE |
| 33c14b40a4d663250dffefdb3ce1f5b4 | 2   | 0.0769230769230769  | TRUE |
| 8e364327698c6e82d690bae5d042c737 | 2   | 0.0769230769230769  | TRUE |
| 80feb2fb070545be75f78cbd6b520d5f | 2   | 0.0769230769230769  | TRUE |
| 8253a32e37cc65a796a92ee6b750d870 | 17  | 0.0845266956187741  | TRUE |
| 8fcdcca36d7698798f6aa46b028ac8f7 | 9   | 0.0864096619651255  | TRUE |
| b0d5a4ec8e74ac4c6cb4ecb9d06183d8 | 9   | 0.0864096619651255  | TRUE |
| 415033681d70ab871d00f8e199d5485d | 9   | 0.0864096619651255  | TRUE |
| 3dd272f8e982d693ab208a7fd3552074 | 9   | 0.0864096619651255  | TRUE |
| 536bca28d3d53844b1880b427e53dcc  | 10  | 0.105007314060969   | TRUE |
| 5c96ec70d2839b27eb48f2226c96e2ca | 10  | 0.105007314060969   | TRUE |
| 4a765a31e0cf23936b0d98af5fb07b81 | 3   | 0.115173403255331   | TRUE |
| 9cd7f253e5f398b99b607964de56e802 | 3   | 0.115173403255331   | TRUE |
| 006447e914f38b29a86b92aab7b8145d | 3   | 0.115173403255331   | TRUE |
| e07ec8b4bb1731226c8bbe954aa9dfd7 | 3   | 0.115173403255331   | TRUE |
| 495baebe669e1a07a3638212d694929c | 3   | 0.115173403255331   | TRUE |
| b32b830756e43af68ac23a4f88d98118 | 3   | 0.115173403255331   | TRUE |
| ba14674a604faae7a83e0ab9d7151dcd | 49  | 0.115653659271681   | TRUE |
| df6485f0c59f870ffa34796e56205884 | 4   | 0.153031417037874   | TRUE |
| 6836e6f80ca06e20471efbe1f47dffe  | 4   | 0.153031417037874   | TRUE |
| 2700db6dd1459de93b072b5f8f90c146 | 4   | 0.153031417037874   | TRUE |
| 8089fc5cea667447a21f0c665b78e89c | 4   | 0.153031417037874   | TRUE |
| 872d11b3c9c9e72c129296b6ab82e76a | 4   | 0.153031417037874   | TRUE |
| 776b3cb9d774b6e0c45c45ccc1764f1b | 4   | 0.153031417037874   | TRUE |
| 0d87b112bc336b97248bf4757a668689 | 4   | 0.153031417037874   | TRUE |
| 1bfdcd56f0549c7953359140bbdc64b1 | 13  | 0.166895948842549   | TRUE |
| d372b6450fe1d69ae6cb673dfafdc6d  | 14  | 0.18905177036381    | TRUE |
| 490a5a0203d6a3ce512fe7566a89299c | 5   | 0.190342995483322   | TRUE |
| 546a3202fd799a7240d2592ac0444502 | 5   | 0.190342995483322   | TRUE |
| 1b18df940027dc40b173be56b5b2c39a | 5   | 0.190342995483322   | TRUE |
| 8cd7646d4eee2b702e680c9a36aa93ee | 5   | 0.190342995483322   | TRUE |
| e3064dc22ea1c1084cae7e065ec8305c | 35  | 0.19916119737622    | TRUE |
| 074478577353df0840cde9827351d2e9 | 15  | 0.211740989485119   | TRUE |
| a022ba393ceb3a7e109b171c5e901b31 | 15  | 0.211740989485119   | TRUE |
| 1189d4ef3af60ba943cc73161a4097a9 | 15  | 0.211740989485119   | TRUE |
| 7e06f6f4c9c89933a432f36767cf8f5c | 6   | 0.226978141364239   | TRUE |
| 16357c104069b5c62302e913480dce46 | 6   | 0.226978141364239   | TRUE |
| 127b623fd88482c6bf125beda04dba52 | 6   | 0.226978141364239   | TRUE |
| 8b2b5fea59a9f7c4b75b285985f8bc45 | 6   | 0.226978141364239   | TRUE |
| 9cd232a91d762e72b8695ef807e4b595 | 6   | 0.226978141364239   | TRUE |
| 56d2f08c47e1fe5e8b11c758e3df45c4 | 6   | 0.226978141364239   | TRUE |
| 7cbcb853e8b0fc4e4ae9ad8a8893a7df | 6   | 0.226978141364239   | TRUE |
| 42ae34a9e758d6ba2c23b9e32be90e80 | 6   | 0.226978141364239   | TRUE |
| d0fd1a04107c82982b655553b7bcf41  | 6   | 0.226978141364239   | TRUE |
| b558365592f7a8d645f69873f6cda354 | 6   | 0.226978141364239   | TRUE |
| e78a758dd0cf4ecdeec205371b214817 | 6   | 0.226978141364239   | TRUE |
| 262dc7bf78e937b0c7065aef82e18d08 | 6   | 0.226978141364239   | TRUE |
| 53e1b42a26f12c7056f1acb645630a26 | 6   | 0.226978141364239   | TRUE |
| 74d8b8501ebe056c7685c5f09a15ad1d | 6   | 0.226978141364239   | TRUE |

|                                   |     |                   |       |
|-----------------------------------|-----|-------------------|-------|
| 6e5eea14c8f71331e69a36f9df2e47c   | 6   | 0.226978141364239 | TRUE  |
| e52a5d6f0e2560fe327b2f502dd5a024  | 6   | 0.226978141364239 | TRUE  |
| 8aa02408859b45f0f98146372cadf479  | 6   | 0.226978141364239 | TRUE  |
| 2cb9077e3906b643cc06d7bf5c82e57   | 175 | 0.235878918358532 | TRUE  |
| 6145f51f090994c4a43f7cea73f90091  | 17  | 0.2582325274065   | TRUE  |
| e269d8c81692a109f5be5e0d96cc45f4  | 17  | 0.2582325274065   | TRUE  |
| d5cd3fcdfc36006692274229875ace16  | 7   | 0.262828389827809 | TRUE  |
| 168860bd1024ae270960f35b81de4cc3  | 7   | 0.262828389827809 | TRUE  |
| 029af632b2cc681c2baac604bc1d0f87  | 7   | 0.262828389827809 | TRUE  |
| 7840fd72d5760bf9d7c7d6e05e15b1d   | 7   | 0.262828389827809 | TRUE  |
| ca3d5ad542f41c1b2dca122a276dd68e  | 7   | 0.262828389827809 | TRUE  |
| ec5b70612ab541270f99ac9ccb03c57a  | 7   | 0.262828389827809 | TRUE  |
| 5ec80473635e19defc7cb89911f32028  | 7   | 0.262828389827809 | TRUE  |
| bfe54af4c9180d37a0d76f6dafa79a5a  | 7   | 0.262828389827809 | TRUE  |
| 527f393f41091fdc92723873b3f241f4  | 7   | 0.262828389827809 | TRUE  |
| 4dfc1ccde14bb2c6f22c28071d19002d  | 7   | 0.262828389827809 | TRUE  |
| efb8602f3d0765aaf09b975799823da9  | 7   | 0.262828389827809 | TRUE  |
| 5406ba4d58928df06e4f23d5a090f3d3  | 7   | 0.262828389827809 | TRUE  |
| 65a39bc08ea93ac99b021f4dc1850237  | 7   | 0.262828389827809 | TRUE  |
| bd2ebc70501f7d867c204f94c4e483da  | 391 | 0.277100555069908 | TRUE  |
| 340d2fc0f9822e35f88b16537341315c  | 8   | 0.297804452748937 | TRUE  |
| 8c416f8840299049567cb009734c133d  | 8   | 0.297804452748937 | TRUE  |
| 668fdb718997fc1589c7817655d4bb5f  | 8   | 0.297804452748937 | TRUE  |
| 53d5533a6429e4aa7d6998450efe4a0b  | 8   | 0.297804452748937 | TRUE  |
| 1ebadfa667c9a909e90f32ae471aee3b  | 8   | 0.297804452748937 | TRUE  |
| 4fbbe364adcd3e3a84f51a161ebfa54b7 | 8   | 0.297804452748937 | TRUE  |
| 7124e1c5c05a47eade99eb30e14ca10d  | 8   | 0.297804452748937 | TRUE  |
| b2487c386ddc1a950ba23034e0d108ba  | 53  | 0.298909268067355 | TRUE  |
| a71d241034f123d92d2460ffa097445   | 19  | 0.305485539889719 | TRUE  |
| d8ecd05fc246253fa7171e885a429464  | 20  | 0.329158787407426 | TRUE  |
| 986d1160fa2c6d6e1b39adda581cbd09  | 9   | 0.331834080910981 | TRUE  |
| b474087ebf36a250a0d6e688aac9b18   | 9   | 0.331834080910981 | TRUE  |
| de0880c59770b57d7bce7a58c29a63a4  | 9   | 0.331834080910981 | TRUE  |
| 37bea876591b5db836c3cf500aeb2c4b  | 9   | 0.331834080910981 | TRUE  |
| 743877d0dd17489090dfcc618262fe52  | 9   | 0.331834080910981 | TRUE  |
| 2967fc5e7264a9da63556dc7aa011846  | 10  | 0.364860125823334 | TRUE  |
| 29edd9d99bdeb69d7f7425b1fd0ba57e  | 10  | 0.364860125823334 | TRUE  |
| 2e1a0c95b8b627148e4efc1a2e2124d3  | 10  | 0.364860125823334 | TRUE  |
| 0bb1c8431343726b5826ba41bceb2deb  | 10  | 0.364860125823334 | TRUE  |
| 69c82a0446a784e0f628baba67a71a38  | 76  | 0.379808917624895 | TRUE  |
| 73bf8d1a5983e34a0cb84e3cae127815  | 433 | 0.382965201505468 | TRUE  |
| ef5b1d86471ba81aeaf0675cb5f133b6  | 11  | 0.396838784394777 | TRUE  |
| 22c8e6e55e7d3f64fc2dfd7b5cc181a2  | 11  | 0.396838784394777 | TRUE  |
| 6b0ff3b95f5a0170f8cf05f2d648be69  | 11  | 0.396838784394777 | TRUE  |
| 0047d48fbaf4753f25019037f802349   | 11  | 0.396838784394777 | TRUE  |
| c48ebcb64a879ac3131a8157726e0ce1  | 11  | 0.396838784394777 | TRUE  |
| 5d6ee23084c6b9c96deb9a83295abc8a  | 78  | 0.408454653042303 | TRUE  |
| e370166a24f9ddb12cc92317e714f124  | 12  | 0.42773801098847  | TRUE  |
| 44beba34c62eb03966645efddedf0d9   | 12  | 0.42773801098847  | TRUE  |
| a32083174848f3d175ed977dc8eed9e9  | 12  | 0.42773801098847  | TRUE  |
| f5d0c756653e860f49eb2ef329840519  | 12  | 0.42773801098847  | TRUE  |
| c6357b5b5bb8c067c51faad5180b4e99  | 12  | 0.42773801098847  | TRUE  |
| 40e44aab0f468d14cc6f40ebef19cb0   | 12  | 0.42773801098847  | TRUE  |
| b1e1799fee04670207c1b71957c46d15  | 12  | 0.42773801098847  | TRUE  |
| 03d52421a28d9b73c5d1716eb520718b  | 12  | 0.42773801098847  | TRUE  |
| 22357830cad050ff79bf4e8f8488beb6  | 12  | 0.42773801098847  | TRUE  |
| 147e062a32552d807a7a72da18b5c56b  | 12  | 0.42773801098847  | TRUE  |
| 508524d40fa1145d6023b5a43a013f4c  | 12  | 0.42773801098847  | TRUE  |
| 70e81e8f3ec3fdc237118834836a5ff0  | 12  | 0.42773801098847  | TRUE  |
| ab4429b988a4f6fc70f599b57a966c47  | 12  | 0.42773801098847  | TRUE  |
| 677929eac52be081cdae08a0b99c70eb2 | 37  | 0.435706683699951 | TRUE  |
| 55e6f47ff8b1dc2064c0182bc4f831a3  | 13  | 0.457536082595734 | TRUE  |
| b68071682d3bd6beb1a552c2500791cc  | 13  | 0.457536082595734 | TRUE  |
| 48d9602985017b3a08622909440fcc9   | 13  | 0.457536082595734 | TRUE  |
| a36165e53c5432cedc59fba58c989704  | 13  | 0.457536082595734 | TRUE  |
| e3acd1847381805fd9cf7f67f238c142  | 13  | 0.457536082595734 | TRUE  |
| 7d17d197d7978be0b6684209ce257e20  | 51  | 0.460922442542212 | TRUE  |
| 1f4f4a82b05eecd5361047345201e66   | 26  | 0.467192815197644 | TRUE  |
| f81aae39d658f14666bbd39fe410294e  | 26  | 0.467192815197644 | TRUE  |
| 165cd1982e320b427a4cfa307f787b38  | 14  | 0.486220303988033 | TRUE  |
| f90e88c52df1bc147bfe9705270cb88f  | 14  | 0.486220303988033 | TRUE  |
| 6f517a2da49d22439a74d5297bdb654f  | 14  | 0.486220303988033 | TRUE  |
| f342485eb28655371ab95467e436666b  | 27  | 0.489003842984167 | TRUE  |
| 436e7f204759c2f369afb864438d1262  | 14  | 0.5               | FALSE |
| c205d0ee4db8c2c892ebe949b0a069da  | 67  | 0.5               | FALSE |
| 38a149a8cc59529f0b4ce29d6a838176  | 162 | 0.500000000000001 | FALSE |
| 7fae0a4914d95fd2426aa8a2ea9ef487  | 236 | 0.500000000000001 | FALSE |
| 0cbf8d071fa1320c4a225b51196da078  | 85  | 0.506863732942227 | FALSE |
| addf71722210dc7bcd173e43b0aae60   | 28  | 0.510360069573429 | FALSE |
| 9ceae8fed3a46d7b83b2131a74cedb29  | 15  | 0.513785840746033 | FALSE |
| 345b2e2f68d0022bf201b41dbd25743a  | 15  | 0.513785840746033 | FALSE |
| 7ed82ab99601f839d82875a9fed6caec  | 16  | 0.540234669026948 | FALSE |

|                                  |     |                   |       |
|----------------------------------|-----|-------------------|-------|
| 3081ffab8e3fff703f35599f9e5571c4 | 16  | 0.540234669026948 | FALSE |
| ce0fe9dd4a105852b029c2ab1d997024 | 56  | 0.541776569825547 | FALSE |
| c112b3dc575ef3b721464d0b49daa905 | 43  | 0.545307707097171 | FALSE |
| 0dc8e0e89e89cf40c71808666f6c6e7  | 30  | 0.551591656513902 | FALSE |
| f03dfffd2e63efb9a0dbc617ffa6fe0a | 76  | 0.564343462092671 | FALSE |
| 44c386760dcb28e8af3b9847120c5d76 | 17  | 0.565574631822175 | FALSE |
| 1b158b8b2922d4fca5d9cea607cbb7d  | 299 | 0.568562781856852 | FALSE |
| ee32615285e3f0dfe911611dbd723a22 | 2   | 0.574036511156187 | FALSE |
| bd8963179f96afda80d644b420b327ef | 2   | 0.574036511156187 | FALSE |
| 495cda065a2ac9820db531b20e15aa1a | 2   | 0.574036511156187 | FALSE |
| 59ebca98884af4ca79e99f56319810e6 | 2   | 0.574036511156187 | FALSE |
| 651b456fad22829867a61aff2a233caa | 2   | 0.574036511156187 | FALSE |
| 40e9bb5ebb3c3102bb2bb4efe90a3a91 | 2   | 0.574036511156187 | FALSE |
| 2af0887c08fc8372e9894be7dd331020 | 2   | 0.574036511156187 | FALSE |
| fc49e88a96a3582603047d56f9834715 | 2   | 0.574036511156187 | FALSE |
| b76be88631fc1577ea6251a4ea6ad5be | 2   | 0.574036511156187 | FALSE |
| ece6618fc76d78380d6aa565960048f5 | 2   | 0.574036511156187 | FALSE |
| 746cc895942c2f16e6f9e05d9a912f00 | 2   | 0.574036511156187 | FALSE |
| d3326adfc4e7e9d8ea929cc2b5ced9f9 | 2   | 0.574036511156187 | FALSE |
| ea60a6f4d4e904f8f2d74612da65f602 | 2   | 0.574036511156187 | FALSE |
| 569333c671b24e2363d54e4671bb4cfd | 2   | 0.574036511156187 | FALSE |
| eadced2b44e8b968c557dfd8b5ac02dc | 2   | 0.574036511156187 | FALSE |
| 329dade18db9c95dd219f5689ee777a3 | 2   | 0.574036511156187 | FALSE |
| 2613b77df8ce69292ad18bac50100e66 | 2   | 0.574036511156187 | FALSE |
| 45c9cc46f257ba8de190eedb3dda5a36 | 2   | 0.574036511156187 | FALSE |
| 5c596a361996ea8d199802e4e34a6dee | 2   | 0.574036511156187 | FALSE |
| 5bbe0a3078b4537152c396ef08fe6e78 | 2   | 0.574036511156187 | FALSE |
| fbe5f855d23b47ec4e757e0fa3818ce5 | 2   | 0.574036511156187 | FALSE |
| acd5713a39bbcb804b886f98694671b7 | 2   | 0.574036511156187 | FALSE |
| 3a247cedad2882a4fd1104f0ab9a65ca | 2   | 0.574036511156187 | FALSE |
| 0bd637004516b97302a1f56e4f4d337a | 2   | 0.574036511156187 | FALSE |
| 146bc18aaafd9fc303f5cc2870c8e52  | 2   | 0.574036511156187 | FALSE |
| bd4660e763464929bf79b4eeea699730 | 2   | 0.574036511156187 | FALSE |
| c54410317ca2d9aa7aa88daa1147b46e | 2   | 0.574036511156187 | FALSE |
| dcc015b723865292b60a75224f821f71 | 2   | 0.574036511156187 | FALSE |
| 0360a55d85a1a3707023ff92dc73f805 | 2   | 0.574036511156187 | FALSE |
| 49b154d4c99e12186f73403e5ee94e83 | 2   | 0.574036511156187 | FALSE |
| 8c186c80797f8c256dc61aef623d3411 | 2   | 0.574036511156187 | FALSE |
| bd6a338d9c0a72f4b1a8410f16b85232 | 2   | 0.574036511156187 | FALSE |
| a2068af49962d42e50ab5c8a0b744b71 | 2   | 0.574036511156187 | FALSE |
| 2f08fd7c00722cdaeb01512616c093a5 | 2   | 0.574036511156187 | FALSE |
| b76404fb4d67434e693101ad1595767c | 2   | 0.574036511156187 | FALSE |
| e20f803f58f5ce46feabb0516cd02431 | 2   | 0.574036511156187 | FALSE |
| acffff1db4fa874c7ff9e2825dd29a4b | 2   | 0.574036511156187 | FALSE |
| 39e98dd4e807cd97e92b9f2169caf9f  | 2   | 0.574036511156187 | FALSE |
| 791618ea7f777b9c2e7f908eebc1f2a1 | 2   | 0.574036511156187 | FALSE |
| 919de377b64f65dd94f18d0fca292bac | 2   | 0.574036511156187 | FALSE |
| dbf82288883244531ea0b57e2ed04a2a | 2   | 0.574036511156187 | FALSE |
| 6b4fab5c304a37dd85146749d0028d87 | 2   | 0.574036511156187 | FALSE |
| 66c196e506f48ac22b611efac4a498d7 | 2   | 0.574036511156187 | FALSE |
| 981823f8c26086d499b6917a34f5961c | 2   | 0.574036511156187 | FALSE |
| 20fc8421a8c7570128653af9f9e5c63  | 2   | 0.574036511156187 | FALSE |
| 9d73ad67d5a5acbf511c78c859272821 | 2   | 0.574036511156187 | FALSE |
| e5abe350b1c88e1126e9074c6e93ef15 | 2   | 0.574036511156187 | FALSE |
| b3d6fcd212a9fd5fde39a3d79fe2faa  | 2   | 0.574036511156187 | FALSE |
| 1730d6157fef2851906040de8a99d96b | 2   | 0.574036511156187 | FALSE |
| dc40f19361b9081547655a601487f5ae | 2   | 0.574036511156187 | FALSE |
| 3ed213ab80d34478dfc82075098049d  | 2   | 0.574036511156187 | FALSE |
| ccea7446425ef2321bda5cb26650e0df | 2   | 0.574036511156187 | FALSE |
| 97e91a44d9196a4f419d23186ef530bc | 2   | 0.574036511156187 | FALSE |
| 480018a3dae196593b9153ec81e6d9dd | 2   | 0.574036511156187 | FALSE |
| e13ef43b8d2b3a52b013425e712fbf02 | 2   | 0.574036511156187 | FALSE |
| a70bdbc2f74cab32c202b027329fef19 | 2   | 0.574036511156187 | FALSE |
| bdb6ca07b4442f773d274bb49ef6a218 | 2   | 0.574036511156187 | FALSE |
| 000e38f477632fa6299901badf2e0f06 | 2   | 0.574036511156187 | FALSE |
| 70d3445bf16d2a93bcc75728b6d56c4b | 2   | 0.574036511156187 | FALSE |
| 0c72ae13d05b1abb477b63055be82120 | 2   | 0.574036511156187 | FALSE |
| c24ecd06ba3dbda7902b9f911bf372b9 | 2   | 0.574036511156187 | FALSE |
| 19981ee4c04815f6a74c02c8278b4dac | 2   | 0.574036511156187 | FALSE |
| 6bf39213fe84abc512eabc37315923b  | 2   | 0.574036511156187 | FALSE |
| 473bc5c589d3abf37972dd9c7cde20bb | 2   | 0.574036511156187 | FALSE |
| 34216a28c46c028e1026aae8d27271d6 | 2   | 0.574036511156187 | FALSE |
| 6f0deb7981650ae3e9ee2c309a4565e4 | 2   | 0.574036511156187 | FALSE |
| 963582325831c0cd60c85bb2a828935f | 2   | 0.574036511156187 | FALSE |
| dd14a2ab8cafb7651bdb1cce5773535  | 2   | 0.574036511156187 | FALSE |
| 22d32c27c94d47482fd25cb0e8c65e38 | 2   | 0.574036511156187 | FALSE |
| acc70fa94c2ae515818445e37268f59f | 2   | 0.574036511156187 | FALSE |
| 35d552e9aa4e7126cc2489e0b0aab0db | 2   | 0.574036511156187 | FALSE |
| 495174360f9b450d25be0fcd035630b  | 2   | 0.574036511156187 | FALSE |
| 1a528eea8d2f33474bd7f647cc1ba694 | 2   | 0.574036511156187 | FALSE |
| 5c6ac5a27dd6c66c995e76f28ff3fea4 | 2   | 0.574036511156187 | FALSE |
| 9dabf344a87b6c26d226351cc10a2a5d | 2   | 0.574036511156187 | FALSE |

|                                   |    |                   |       |
|-----------------------------------|----|-------------------|-------|
| f59eb777bfe41f27f84f114609d558ce  | 2  | 0.574036511156187 | FALSE |
| 44cbe35f49cc2825a1cab0c45875238b  | 2  | 0.574036511156187 | FALSE |
| 66781e54d7c70751dd4315324ee6a730  | 2  | 0.574036511156187 | FALSE |
| 5bdaad19f2a370833f353f14c372764e  | 2  | 0.574036511156187 | FALSE |
| eef731495f535ba4c0e34f7b6827b01d  | 2  | 0.574036511156187 | FALSE |
| 65a1f76dd20322568fa79a52f095c4d3  | 2  | 0.574036511156187 | FALSE |
| 7f0e8f6049e044128bb02c2904584fe9  | 2  | 0.574036511156187 | FALSE |
| addb5446f7a31c8057158bfb2e88a25   | 2  | 0.574036511156187 | FALSE |
| c8f0d849875f193a6dfb78ce2f923fac  | 2  | 0.574036511156187 | FALSE |
| d1a66fbb0ffb55d8ca5bde15afd2cbfd  | 2  | 0.574036511156187 | FALSE |
| b75f8c1ee5be34e1e86f0794da0994a6  | 2  | 0.574036511156187 | FALSE |
| d60b57fe3931d10aff6007227c714b94  | 2  | 0.574036511156187 | FALSE |
| b524bdb0093f4363f6dccc957c3bc0cab | 2  | 0.574036511156187 | FALSE |
| 4a32f1635f88214c4874ee85df56595   | 2  | 0.574036511156187 | FALSE |
| 1bc6c19320b6c5d08d6af72f39ca7028  | 2  | 0.574036511156187 | FALSE |
| 12c7139b414de8443898fa448413c98e  | 2  | 0.574036511156187 | FALSE |
| 59555b720479b4dae97998e8573280ce  | 2  | 0.574036511156187 | FALSE |
| 3f3a185ee907d56d95b84ccb84399854  | 2  | 0.574036511156187 | FALSE |
| 8c311c27f6e8803ed957220d8645a52   | 2  | 0.574036511156187 | FALSE |
| d8b253da31cae9272be8c76108df2c79  | 2  | 0.574036511156187 | FALSE |
| 11f72383f466cfd3d9c00fb0ddf1a187  | 2  | 0.574036511156187 | FALSE |
| 6bf6bc06c4696e95747f2584057622c3  | 2  | 0.574036511156187 | FALSE |
| 5f0af45dcc3031ff73fa133f78f01dff  | 2  | 0.574036511156187 | FALSE |
| d7059e9440d7d26e2e445d56303678d2  | 2  | 0.574036511156187 | FALSE |
| 59b13e3e404561803ca77c7fe3d03a0a  | 45 | 0.579476602130643 | FALSE |
| 69e611251f4d8582e312afa5737f033e  | 46 | 0.596027827052081 | FALSE |
| d4bb3a2a7d6486a2201bb8770fb0a6d   | 3  | 0.606936130213229 | FALSE |
| f5a382df02639db40c978149c852f631  | 3  | 0.606936130213229 | FALSE |
| 3c862616eb99d4336427f8c121410e30  | 3  | 0.606936130213229 | FALSE |
| 327af6c728df4ea81eb33ebb1c7b1f9c  | 3  | 0.606936130213229 | FALSE |
| a256dcba109fe74b499e4690f7297bd   | 3  | 0.606936130213229 | FALSE |
| 8dc44508eb6a496df987c76cf6a23e10  | 3  | 0.606936130213229 | FALSE |
| 4ae0b8cee8d20168e08cb4f11ab7aeea  | 3  | 0.606936130213229 | FALSE |
| 0d3677300a537a199d53c388dd4f9d14  | 3  | 0.606936130213229 | FALSE |
| efea489e9aeea8ea8714c557cca5599d  | 3  | 0.606936130213229 | FALSE |
| 0cdc9b91d67a45a312f99f2e1a3b1462  | 3  | 0.606936130213229 | FALSE |
| 25817204502b01664ae7e0b787a23d35  | 3  | 0.606936130213229 | FALSE |
| 3d95c89ac99d998a8702babf9a83b566  | 3  | 0.606936130213229 | FALSE |
| b6d5dae42d6441946b72536202970b6f  | 3  | 0.606936130213229 | FALSE |
| 78643cfd45f5d0e81fab3682a85bbe11  | 3  | 0.606936130213229 | FALSE |
| 6d51a149e8639a5edc3818184b07ef43  | 3  | 0.606936130213229 | FALSE |
| cee08a446ff68f17526d7e203bbe871e  | 3  | 0.606936130213229 | FALSE |
| e2dc6ea9ee0035962b6ecdcb882c648f  | 3  | 0.606936130213229 | FALSE |
| ee496894344fde402c4a74ee69ad20fe  | 3  | 0.606936130213229 | FALSE |
| ae31c634072e81af29cf4f857b5ceeab  | 3  | 0.606936130213229 | FALSE |
| 4675c263dc11b27a89c8b1a740a2b528  | 3  | 0.606936130213229 | FALSE |
| 445dc3e0e095d35c29018c23a15e9aed  | 3  | 0.606936130213229 | FALSE |
| 2605f404644ae0b60c1bbc901c97f065  | 3  | 0.606936130213229 | FALSE |
| 788883e3b7ee47924346c610b2ab6014  | 3  | 0.606936130213229 | FALSE |
| 85b4d7d480ef06ef2844b93115d87480  | 3  | 0.606936130213229 | FALSE |
| 8a0c8e17b96eaf823d7f5b6ba2fa1a2   | 3  | 0.606936130213229 | FALSE |
| 3d1f0db0a5df73cc2642739c4ee2b98c  | 3  | 0.606936130213229 | FALSE |
| 3b80c7cd38deabc389b31026c8195e2a  | 3  | 0.606936130213229 | FALSE |
| 03f2666d9f52d8fccc13d113af7f470   | 3  | 0.606936130213229 | FALSE |
| 90eaaad185a24ca78f31616c482b66874 | 3  | 0.606936130213229 | FALSE |
| 41997260ae3f1fa6e7c669acf6fa32f2  | 3  | 0.606936130213229 | FALSE |
| 8a5c6d9fa02edda06539c4df83899ca   | 3  | 0.606936130213229 | FALSE |
| daefb5b04252122ce0f8c0b63169df36  | 3  | 0.606936130213229 | FALSE |
| 7c57923c256db3ea4aa63f12e5afcc9f  | 3  | 0.606936130213229 | FALSE |
| 438dc2a2ea2405a782df5830ae62100e  | 3  | 0.606936130213229 | FALSE |
| 77dd07d2525de28b3d827121cdf463a   | 3  | 0.606936130213229 | FALSE |
| e5816f291546ca05fda640ec24b5c7e3  | 3  | 0.606936130213229 | FALSE |
| 652b78d7b987b1efc1917822209ba690  | 3  | 0.606936130213229 | FALSE |
| a99f6029c214a53baa6613443940b67a  | 3  | 0.606936130213229 | FALSE |
| 519d34f37ef0123b10f482f21b11bf54  | 3  | 0.606936130213229 | FALSE |
| ade61be54713fafdfc05977a921ec339  | 3  | 0.606936130213229 | FALSE |
| 2fd73e273a5ab911a9bab5cc85e8178   | 3  | 0.606936130213229 | FALSE |
| 72ee964de9b0144e80347bd4e7112cf9  | 3  | 0.606936130213229 | FALSE |
| 1eeb8eeacd184a41db687812348d06c   | 3  | 0.606936130213229 | FALSE |
| a6fd733e44ef6fa8048ef0094de67f28  | 3  | 0.606936130213229 | FALSE |
| cceb354db8986b34d8c5b435adfc4324  | 3  | 0.606936130213229 | FALSE |
| 9cab98d9be1a58a0486d67ec723285f0  | 3  | 0.606936130213229 | FALSE |
| ca5e711152517b591d9d48b783f4942b  | 3  | 0.606936130213229 | FALSE |
| ded5b76b4b3e821ef40d5df3fb48c91a  | 3  | 0.606936130213229 | FALSE |
| 65ff839c902a244022b20e77f4aed679  | 3  | 0.606936130213229 | FALSE |
| 3e5b4c5f9ec53fa58f406bb4872c2400  | 3  | 0.606936130213229 | FALSE |
| 579c3508fb7953140df95b7964b55fa0  | 3  | 0.606936130213229 | FALSE |
| 1289b5c9697f9da8b8f9648e728bc50   | 3  | 0.606936130213229 | FALSE |
| 0a9a722df3a13268be23ddee2cc2a0f6  | 3  | 0.606936130213229 | FALSE |
| 209ba71d1bcc4949b4d1fabd2ab1d5aa  | 3  | 0.606936130213229 | FALSE |
| e474c7483a3a1001e73c7aeadf5b8ee0  | 3  | 0.606936130213229 | FALSE |
| 929d9a7f88bd83bc06d889c356d9a13e  | 3  | 0.606936130213229 | FALSE |

|                                  |     |                    |       |
|----------------------------------|-----|--------------------|-------|
| 47f13b66aafef2c4c7f9684ab7275d   | 3   | 0.606936130213229  | FALSE |
| fb5bc4108d4ca6924d7bad409faff095 | 3   | 0.606936130213229  | FALSE |
| 94d028d1bd01f40929f957b02afb576  | 3   | 0.606936130213229  | FALSE |
| f889135f2c43218e4ddd55532ff76c3c | 3   | 0.606936130213229  | FALSE |
| 85539c5100ea1d50723a53eb3099d883 | 3   | 0.606936130213229  | FALSE |
| 89b63341871a7ebd775e6f7064b1707d | 3   | 0.606936130213229  | FALSE |
| c1951d3e81e7f747aa634297072ea77d | 3   | 0.606936130213229  | FALSE |
| d71af0f02e2ca087c76c0a2b710c0945 | 3   | 0.606936130213229  | FALSE |
| 43152d438ac75bad2ec2ec1457fc6ac7 | 3   | 0.606936130213229  | FALSE |
| 0959782df74fea06fad1164f978fdd0e | 3   | 0.606936130213229  | FALSE |
| a3e2eb7398560e8e8686761d78011442 | 3   | 0.606936130213229  | FALSE |
| a8195c108dec446f5c967078c25ebb74 | 3   | 0.606936130213229  | FALSE |
| f79e9a78ab07909675c88e20cb0d95f5 | 3   | 0.606936130213229  | FALSE |
| d92fcfcf215ad9fb193679b04a6737c0 | 3   | 0.606936130213229  | FALSE |
| 3136568cc32e1c6e2d0f114157863862 | 3   | 0.606936130213229  | FALSE |
| 7f68fd259107cfa9ac346ed09c5ef371 | 3   | 0.606936130213229  | FALSE |
| 13cdf5b7da440810afb5d555701d91b  | 3   | 0.606936130213229  | FALSE |
| 3272f6b65b719378bb264a3740b2b40b | 3   | 0.606936130213229  | FALSE |
| ffb4b3994b2616a402100d1577ce4399 | 3   | 0.606936130213229  | FALSE |
| 55a225ab357fc87843d85d47fb8f2282 | 3   | 0.606936130213229  | FALSE |
| c67d690916dc301d204b7cbb2bcc2ef8 | 3   | 0.606936130213229  | FALSE |
| c1ae341aa77f14e7a1e3e62e413527da | 3   | 0.606936130213229  | FALSE |
| f39c1375b0565eda3b6660be8542c729 | 3   | 0.606936130213229  | FALSE |
| 7b6814cac868c1b645d0d8265e0dfd1c | 3   | 0.606936130213229  | FALSE |
| c6890b2e0e1c9ef31f93bff534d80700 | 3   | 0.606936130213229  | FALSE |
| fe8d7e83f839d336881ec8419bb51293 | 3   | 0.606936130213229  | FALSE |
| e0c17f6dde47055ed0caa4a7745e30c9 | 3   | 0.606936130213229  | FALSE |
| 02e0ce559228307ed79cde3fe7b80ab  | 3   | 0.606936130213229  | FALSE |
| 151b90216c2f9ee35e184dafd9021130 | 3   | 0.606936130213229  | FALSE |
| 6babf4c5597da7990b82913ea7ac3ba2 | 3   | 0.606936130213229  | FALSE |
| 85a6f256aa6e1022a8e6bc648f01c037 | 3   | 0.606936130213229  | FALSE |
| 362d9d88f3195db02bbb580a020b0836 | 3   | 0.606936130213229  | FALSE |
| b48900c23466c96cfaf4e4703c038566 | 3   | 0.606936130213229  | FALSE |
| 91090378e3a2b9e5e491fb0a627fb4c8 | 3   | 0.606936130213229  | FALSE |
| 72bb4b354b241a0bd9abd7caec6e9bae | 3   | 0.606936130213229  | FALSE |
| e548b781611a16362f9dbaf34be313   | 3   | 0.606936130213229  | FALSE |
| eee80ff9268cc2e906d5b61786b66fbc | 3   | 0.606936130213229  | FALSE |
| b7dc1eedb15b4565b44c28c5fbbe49f5 | 3   | 0.606936130213229  | FALSE |
| 4e454938d9d1ae77d79ae8bf299a983f | 3   | 0.606936130213229  | FALSE |
| c56ac869661ff7a8d192fede12c318b2 | 3   | 0.606936130213229  | FALSE |
| a4911447e5266f8a7d9bcef199267664 | 3   | 0.606936130213229  | FALSE |
| 1cf5017ed722b6a562933b84a77eeaf  | 3   | 0.606936130213229  | FALSE |
| 67496c58a44c58d60e084c6ae9f5ead7 | 3   | 0.606936130213229  | FALSE |
| 252e8532fee4f48af5e39f7514eb9d0b | 3   | 0.606936130213229  | FALSE |
| 749b5b5cdf99a6ba907ad7e654702c7c | 3   | 0.606936130213229  | FALSE |
| b20f67d057bf23d44987c07876722fbb | 3   | 0.606936130213229  | FALSE |
| 29a2ae2201cb196a28835102b6fad6f5 | 3   | 0.606936130213229  | FALSE |
| 5e94d08d6cbcbf35ab8d171568aa7196 | 3   | 0.606936130213229  | FALSE |
| 942bfb95d8f5f87f5a4340c64becbad0 | 3   | 0.606936130213229  | FALSE |
| 80565df1fb13bea7c5ffe8520f5add51 | 3   | 0.606936130213229  | FALSE |
| 9f7cd43f82859743a9fb6294b413138a | 3   | 0.606936130213229  | FALSE |
| 6faaa11948882a569d8900983904d12e | 3   | 0.606936130213229  | FALSE |
| a4416bcf0ce3d2e25b3db4e987f4d88f | 3   | 0.606936130213229  | FALSE |
| 7a1fbb0c1134ad5443dd743ea4b6f3ac | 3   | 0.606936130213229  | FALSE |
| 5719b9b59cc1ec3e172cc9b9f3f0730f | 47  | 0.6122044368634072 | FALSE |
| e59eb4f8c8550ddeb4ba43baf144ae11 | 19  | 0.612983675440831  | FALSE |
| d56403223c8765b24812c19f1f844349 | 19  | 0.612983675440831  | FALSE |
| 6d3e98290cbcd32480eb921f276470a5 | 19  | 0.612983675440831  | FALSE |
| 860c2d10b074762187a1f3235f22558  | 19  | 0.612983675440831  | FALSE |
| 38bfd3a2cf83da8fe03cea0f6b4f5f3  | 19  | 0.612983675440831  | FALSE |
| 760eb607a6f9eabf73fc3bc008113f73 | 19  | 0.612983675440831  | FALSE |
| 92ac8b57e0db3e849b7c8b0df7802639 | 19  | 0.612983675440831  | FALSE |
| da1f560e36ff5523b6eae1acb26e7799 | 20  | 0.635090590400632  | FALSE |
| 49dc837f8fb48a7b37318967391f96d8 | 20  | 0.635090590400632  | FALSE |
| 834d07b2a02c48a75e52cd3d63f7315  | 162 | 0.635262861075058  | FALSE |
| 9178843fe6c1b2b119e81a324c06e5ed | 4   | 0.637356551907521  | FALSE |
| 79065bc5c081ea35aac41a59226dfaff | 4   | 0.637356551907521  | FALSE |
| 857690bde71e50e3f9d91d2b77c8e675 | 4   | 0.637356551907521  | FALSE |
| 144e1bdc5d10e64c663d3833d416183b | 4   | 0.637356551907521  | FALSE |
| e40124c65379aab7ddc74c3d1c35213f | 4   | 0.637356551907521  | FALSE |
| 6829b5946a95b929e9904067d572db6f | 4   | 0.637356551907521  | FALSE |
| 7fd8ac343154ef6966a03f376782be92 | 4   | 0.637356551907521  | FALSE |
| 8419a2a1403b971c044d92d057e01ecb | 4   | 0.637356551907521  | FALSE |
| 4313fef965a323b897e452786b227480 | 4   | 0.637356551907521  | FALSE |
| 4e7b984fa0360b99ffee1ceb10a122d3 | 4   | 0.637356551907521  | FALSE |
| 258f50eeaf72af21d70c648397c668b6 | 4   | 0.637356551907521  | FALSE |
| 36b69044091011464daa0325da37f61a | 4   | 0.637356551907521  | FALSE |
| dc5030eb18fe395a50b823f2e583dbd  | 4   | 0.637356551907521  | FALSE |
| 4b95050efbe5bb490a63b0410c951326 | 4   | 0.637356551907521  | FALSE |
| 25e956ad84aba7ccf51f84544fe3b8d6 | 4   | 0.637356551907521  | FALSE |
| 3837a63a524a7a187121536fff409284 | 4   | 0.637356551907521  | FALSE |
| 1cd63754d2a45e4da3e2c17c07c39931 | 4   | 0.637356551907521  | FALSE |

|                                   |                     |       |
|-----------------------------------|---------------------|-------|
| 105e6198e75d958ec2bee64369687e8   | 4 0.637356551907521 | FALSE |
| 42b8c9335747b0c86fc68d8adfc8315   | 4 0.637356551907521 | FALSE |
| 9654b46bd802f2c2748ecc5e77d9f721  | 4 0.637356551907521 | FALSE |
| b7c98a016051abbbc602fa6163280ef8  | 4 0.637356551907521 | FALSE |
| 8c40ae61863ad1094a5fe3e7a1e56ee4  | 4 0.637356551907521 | FALSE |
| e5fbcc9c3476c84ce40270b6f0bf4ed   | 4 0.637356551907521 | FALSE |
| 3cf8e3f2936c2215ad012e031a11dfc8  | 4 0.637356551907521 | FALSE |
| 5cc66b33870d22cf990e6a8ca618bb2a  | 4 0.637356551907521 | FALSE |
| cad4e11393fe489023ae6a9724d6894d  | 4 0.637356551907521 | FALSE |
| 77f21f2da2d7b5fd7e7730b964e1ca40  | 4 0.637356551907521 | FALSE |
| a509a05ddfc4a6df40cd9b1e75cb5f84  | 4 0.637356551907521 | FALSE |
| 618799965cb9cfae385cc63346f300f   | 4 0.637356551907521 | FALSE |
| bfd1c34f739028e507f085cdb991a0a2  | 4 0.637356551907521 | FALSE |
| 8d790eff268748c8792ab4fd07100e8a  | 4 0.637356551907521 | FALSE |
| 418d67cfd71b0f894bd6752f91a55124  | 4 0.637356551907521 | FALSE |
| 3f33b7ba47ff472f3dfa37699b3d4945  | 4 0.637356551907521 | FALSE |
| fc1b76278975ee14760e108221ce14f0  | 4 0.637356551907521 | FALSE |
| e56bd9b14d748dde0d00bfcba0c059b3  | 4 0.637356551907521 | FALSE |
| ee5c297bd9fff3db3dca564f4de2b083  | 4 0.637356551907521 | FALSE |
| 392be618576de3abfe491746b24b64fc  | 4 0.637356551907521 | FALSE |
| 402e5913597695a16d7cad415ffff02f  | 4 0.637356551907521 | FALSE |
| bfedbe08a11c47b4f1fba543a22b5d75  | 4 0.637356551907521 | FALSE |
| 0a9507c499d16037a527e88e32e7555a  | 4 0.637356551907521 | FALSE |
| 89623e037318e0f10a2b26123022dc25  | 4 0.637356551907521 | FALSE |
| 7f0a3ceb166fa8b6b8c6169d5d2ee21   | 4 0.637356551907521 | FALSE |
| 5228eae5a2de5ec5faecaf127b4488b   | 4 0.637356551907521 | FALSE |
| 2f1a6634dba0fc6e04a10a0ab23bee9   | 4 0.637356551907521 | FALSE |
| ccc5b420e1a3e5b891e8a467366084ee  | 4 0.637356551907521 | FALSE |
| 459a2ee9b40cae14ff8b1154046a45bf  | 4 0.637356551907521 | FALSE |
| 5ac0ca1b313546c59510815ec598f6d4  | 4 0.637356551907521 | FALSE |
| 9a1299533fdc202ea9dd1f8145e15c45  | 4 0.637356551907521 | FALSE |
| 1320e90134d8dd811304a92366e035b4  | 4 0.637356551907521 | FALSE |
| 7b25dfc72ef88a31085ef11f520cbc9e  | 4 0.637356551907521 | FALSE |
| d6f114c9b544a83d9650ee4091d3c8e6  | 4 0.637356551907521 | FALSE |
| 6dcfd39fe967d9a976c330487e0ad0f0  | 4 0.637356551907521 | FALSE |
| 3cd349d8dfdf16a5902fb77218065d47  | 4 0.637356551907521 | FALSE |
| 98976c388182f72eaf6444f252df2c4b  | 4 0.637356551907521 | FALSE |
| f83d060cdb08f3a5c14531d80cb10d90  | 4 0.637356551907521 | FALSE |
| 7bb75a908f84cea53943cd1359b1deda  | 4 0.637356551907521 | FALSE |
| 1d4755131d0455f2ec5886e574308f11  | 4 0.637356551907521 | FALSE |
| aba879ff5d1205f49a5c7c257679f61   | 4 0.637356551907521 | FALSE |
| 32e4f11674dad6bcd7909e3a195f33c   | 4 0.637356551907521 | FALSE |
| f34bde4e8b265f13ee0a2e4b2e72532b  | 4 0.637356551907521 | FALSE |
| 39a7609929b77123cfe01080cd3a8ac8  | 4 0.637356551907521 | FALSE |
| c6ff7bf11a21be39a971d86ac3f5ff02  | 4 0.637356551907521 | FALSE |
| 768d8ea38ea385a980b2218b8ccc6966  | 4 0.637356551907521 | FALSE |
| 391d3538ad8650017b13fe98bde557a8  | 4 0.637356551907521 | FALSE |
| 2178c86013f371f34ca8b6d82283dae9  | 4 0.637356551907521 | FALSE |
| 2bd44a9b4d580c5af16e7858b5554f05  | 4 0.637356551907521 | FALSE |
| ece5f619b7415de3b8df0c94e1e708b0  | 4 0.637356551907521 | FALSE |
| 1b4572cc774d5173d5e09c03dbbca0eb  | 4 0.637356551907521 | FALSE |
| 88ab02c4a5b3b7fde63cdc6a21bdb6a5  | 4 0.637356551907521 | FALSE |
| 941e623512e7f598fc9942eaae0a6e70  | 4 0.637356551907521 | FALSE |
| 044e0092f4724300a52cce5c5fd4e882  | 4 0.637356551907521 | FALSE |
| 31921717848a5efcb875586d869f53f9  | 4 0.637356551907521 | FALSE |
| 71decf7564882efd1d2190fd29460d40  | 4 0.637356551907521 | FALSE |
| 16babbc126b1836db96e5b5f9d59bc8a7 | 4 0.637356551907521 | FALSE |
| 31f7982d2607c5b3685d6c3974f2ed79  | 4 0.637356551907521 | FALSE |
| 8d4c51764c41d581fadd36ab1a7db29d  | 4 0.637356551907521 | FALSE |
| 30077f5042a2a53449f3aff0a7f21b7   | 4 0.637356551907521 | FALSE |
| 7cc6f23189123997fb56b704764660d8  | 4 0.637356551907521 | FALSE |
| 420001a74ca908712b4924c90f2fa112  | 4 0.637356551907521 | FALSE |
| 15a9309869945ab937c92fbc690903ef  | 4 0.637356551907521 | FALSE |
| e503811c021343f5b11caed81d435f07  | 4 0.637356551907521 | FALSE |
| 4ce4bc11c99a28b0fe57853364b8451e  | 4 0.637356551907521 | FALSE |
| adc1e763a2e0ce37c9340ff2e25940d   | 4 0.637356551907521 | FALSE |
| 888f1e27e68f8c06512e9bfff356a16e  | 4 0.637356551907521 | FALSE |
| b0d17476ed8f57285dc3fd68d30d84c   | 4 0.637356551907521 | FALSE |
| 65e5847f2fe022a965dc8d4fca56434f  | 4 0.637356551907521 | FALSE |
| 06e10170152a7df3a946a557400c4bd7  | 4 0.637356551907521 | FALSE |
| 5e3736d7500f1847fde308557ffbcfdd  | 4 0.637356551907521 | FALSE |
| fb3ace8db3915ddb8eecd36a05742f1   | 4 0.637356551907521 | FALSE |
| 63a00abba59283d87fa649e4b991da6e  | 4 0.637356551907521 | FALSE |
| 0a11bdf36506b66e44139ff447e2dead  | 4 0.637356551907521 | FALSE |
| 6c75cfbcda95ba7be4b96bd18203552b  | 4 0.637356551907521 | FALSE |
| e0196d786487dae63ea300ec2eac2dad  | 4 0.637356551907521 | FALSE |
| 0ff344210a06866101d371ddca1193af  | 4 0.637356551907521 | FALSE |
| 41c984e77f65b6f4e3a141b213bb652e  | 4 0.637356551907521 | FALSE |
| d51c2d5527534ea09b7c9279d8df7bb3  | 4 0.637356551907521 | FALSE |
| 8f62e1ce476fc35015f544e35bf6b791  | 4 0.637356551907521 | FALSE |
| a10540eb078d6525325f1e1f2a607387  | 4 0.637356551907521 | FALSE |
| a02a6468b6682c4ab0fb31b8e080a30   | 4 0.637356551907521 | FALSE |

|                                   |     |                   |       |
|-----------------------------------|-----|-------------------|-------|
| 341d0af40ca4d417d5d4b795ecb0cf34  | 4   | 0.637356551907521 | FALSE |
| 64301da69a74b94ac07fc109172f2c1a  | 4   | 0.637356551907521 | FALSE |
| 264e7ee6f0bf9bd1888f5b1bc40e18c9  | 4   | 0.637356551907521 | FALSE |
| 3e30a1f52cc81e130b8c023988acf9d5  | 4   | 0.637356551907521 | FALSE |
| 0ea6c0d1c3fc13d6a4d01653e44f19e4  | 4   | 0.637356551907521 | FALSE |
| cf4b69428c4fbc0a55b81d9cfcf7604d  | 4   | 0.637356551907521 | FALSE |
| 3d06d03c32c7b6782a377199e96f576e  | 4   | 0.637356551907521 | FALSE |
| a35640f17ff92ea37bea4104d9bb7f1e  | 4   | 0.637356551907521 | FALSE |
| 9fdb12014b64c13ab70cac6ab62b02ef  | 4   | 0.637356551907521 | FALSE |
| 803a31819695ae771de888afe8af7e71  | 4   | 0.637356551907521 | FALSE |
| 290d9dfd81df5f7192e22b2b347f4120  | 4   | 0.637356551907521 | FALSE |
| 1734c3e181110615bde5b21025d3976   | 4   | 0.637356551907521 | FALSE |
| 91f9cd9795f7b8793d9e06af80b0d056d | 4   | 0.637356551907521 | FALSE |
| 0af9cf4f3e0a17840c19fda47ff11769  | 4   | 0.637356551907521 | FALSE |
| 202df81eb46cfff330eeeee7e00092e   | 4   | 0.637356551907521 | FALSE |
| ab61dbbc92d649f771918bab6ab7bbd1  | 4   | 0.637356551907521 | FALSE |
| 1056f4b6efc9797605ca25674fac9912  | 4   | 0.637356551907521 | FALSE |
| 45c63731d8dbb3b9e663139022627d43  | 4   | 0.637356551907521 | FALSE |
| c1b4edf475fac73cbb145b05d22e6e3a  | 4   | 0.637356551907521 | FALSE |
| b1d39025553d5a2e77eed0fd245eee5d  | 4   | 0.637356551907521 | FALSE |
| 0c3ca4bdbcc55a1eaf440eb73dd01a8a  | 4   | 0.637356551907521 | FALSE |
| 0a0f6a64b9bca840e46c7285b457c36b  | 4   | 0.637356551907521 | FALSE |
| 7cbbafaca7a9bbb37376880e4a0f14e   | 4   | 0.637356551907521 | FALSE |
| 87118b7c468f54f714cd3a4701f728a4  | 4   | 0.637356551907521 | FALSE |
| c6aae8ae72923155732f2e48a26b2fb9  | 4   | 0.637356551907521 | FALSE |
| 6359fb9ad7c1e779f94c583a2ec6fce5  | 4   | 0.637356551907521 | FALSE |
| 3bab94bbc9e095798d906d0afdc6d67f  | 4   | 0.637356551907521 | FALSE |
| 3752c0937de8a03bbbf765819c78099   | 4   | 0.637356551907521 | FALSE |
| c967baaf09da450bd29583233ea1a781  | 4   | 0.637356551907521 | FALSE |
| c0c03235e8911295a37e19ba1c0af1a3  | 4   | 0.637356551907521 | FALSE |
| b73ff1487c71f12a47318e8e9df59f04  | 4   | 0.637356551907521 | FALSE |
| 90422dff863388c4c097236cdf729f4   | 4   | 0.637356551907521 | FALSE |
| dbf3b32e6fcd7f6db830760df87aa435  | 4   | 0.637356551907521 | FALSE |
| f2cc6eac9ecbcfa96ebd1c178e4ec6a2  | 4   | 0.637356551907521 | FALSE |
| 052bea98ea58d64bc7e0d792d4bb43c8  | 4   | 0.637356551907521 | FALSE |
| b4e05e11ee1b2518be2326d19721217   | 4   | 0.637356551907521 | FALSE |
| 7dbb203fe0dfef7a33364e079154fc20  | 4   | 0.637356551907521 | FALSE |
| d39d3f4f4d4881c0b75864dbe733de6d  | 4   | 0.637356551907521 | FALSE |
| 00f2f103259e0d2d279bec1899a683d5  | 4   | 0.637356551907521 | FALSE |
| fc1c8932bfec8f0f632c63b5095bb577  | 4   | 0.637356551907521 | FALSE |
| 22872cce3904e3a7a73c15e4e63fcc2a  | 4   | 0.637356551907521 | FALSE |
| de260172685c660a90923d290b078fd3  | 4   | 0.637356551907521 | FALSE |
| 38316233d8ebd5de6fdb0b87bdf0c285  | 4   | 0.637356551907521 | FALSE |
| d482a8fc557bc969959b0c2a704c2c16  | 4   | 0.637356551907521 | FALSE |
| 79813aad3f28c52fd69a1e1e7f5892f   | 4   | 0.637356551907521 | FALSE |
| ef628a53847821349bbe7988bcfb924   | 4   | 0.637356551907521 | FALSE |
| 85cfaa63370df8961eebc7b05ba076fb  | 4   | 0.637356551907521 | FALSE |
| 96416a69b1811ba8778fa127f20a3b15  | 4   | 0.637356551907521 | FALSE |
| 8efc96acc5fc0d9b6bda279be150150b  | 4   | 0.637356551907521 | FALSE |
| e4ab5016c0eac0e4fbb1c8ea75b0ca28  | 4   | 0.637356551907521 | FALSE |
| 2aab0c408ab7e997e07d713b70cc5824  | 4   | 0.637356551907521 | FALSE |
| 6854a1092add43549b415370cdb2d0f   | 4   | 0.637356551907521 | FALSE |
| d31fb970ff9b6217462a4e0e52ca4b5e  | 4   | 0.637356551907521 | FALSE |
| a88c5da1937f04d0c44ef7243e9476cb  | 4   | 0.637356551907521 | FALSE |
| 8cf45fe9e1251163b5d801841857a873  | 4   | 0.637356551907521 | FALSE |
| a3699e0b9b431b8f11e1065820deae6b  | 4   | 0.637356551907521 | FALSE |
| 901e24ec7d14fc177f9c15ab0f972d    | 4   | 0.637356551907521 | FALSE |
| 9a11856898d64d590fca69779018c7d   | 4   | 0.637356551907521 | FALSE |
| 46e6034076b1f5aa371734d5c41605c8  | 4   | 0.637356551907521 | FALSE |
| 9232ae2e99a9314f625e80cc5f7a1b77  | 4   | 0.637356551907521 | FALSE |
| 15d8de3365192fca85622a7366050ee6  | 4   | 0.637356551907521 | FALSE |
| 8081227a3285bf886a9aeb207a890c38  | 4   | 0.637356551907521 | FALSE |
| 0cf93a42d2f697d21739461b118851b   | 4   | 0.637356551907521 | FALSE |
| 3baabf8cc3e85c0f8b1d2790db20f838  | 229 | 0.647158144172996 | FALSE |
| 77d6a7db6de3bb1f15a02fdb36f90627  | 69  | 0.652990903333722 | FALSE |
| eac36cc96b0e7277d4a485dbe6199beb  | 21  | 0.656163025642436 | FALSE |
| d31af52f792634b80a89d3d310e619b4  | 21  | 0.656163025642436 | FALSE |
| 8f8539ce9266ce2c572b682f190cc810  | 50  | 0.658378182086215 | FALSE |
| 26c9f4f844da09bdd5c1603be193969c  | 36  | 0.662109791353658 | FALSE |
| a1a3200b76bcd6000a0914892d370b6e  | 5   | 0.665479921351427 | FALSE |
| 442cc2db14651564914488bfdffd5071  | 5   | 0.665479921351427 | FALSE |
| 4c91e1ea3c1279e207a971df915d6178  | 5   | 0.665479921351427 | FALSE |
| d6819c57d6aac8113578b04b0911dc2   | 5   | 0.665479921351427 | FALSE |
| 79639ce66720319d718c17711fae3704  | 5   | 0.665479921351427 | FALSE |
| 8bfe73e7d3c17f599aec113950d751de  | 5   | 0.665479921351427 | FALSE |
| 501c1cf67a877c81057dd3fb330ddc18  | 5   | 0.665479921351427 | FALSE |
| a412a5462ab0b34fa3b0b6dcdfa66b7f  | 5   | 0.665479921351427 | FALSE |
| 5ba826b6728c5f7a97293ac6c310a446  | 5   | 0.665479921351427 | FALSE |
| e5ca098c7ee4d0fc9ff60e16e577c2b0  | 5   | 0.665479921351427 | FALSE |
| 03efc0161abb4e11e93f1870e9d5df40  | 5   | 0.665479921351427 | FALSE |
| 4b2862d8ddf6848328ccc64dbc6af0c2  | 5   | 0.665479921351427 | FALSE |
| 985e584faf3be7a41d1bca9d8e598817  | 5   | 0.665479921351427 | FALSE |



|                                   |   |                   |       |
|-----------------------------------|---|-------------------|-------|
| 56d75f22814ed2e9bb37c1452b26bc10  | 5 | 0.665479921351427 | FALSE |
| 37ec4bfd1c6ad9de0c6feef00d98d8a1  | 5 | 0.665479921351427 | FALSE |
| 800f4b5ec4543c7757ff29f6d5941d39  | 5 | 0.665479921351427 | FALSE |
| ed40b08eedec4f873d38551aa43b0fde  | 5 | 0.665479921351427 | FALSE |
| 1dbd3332661515bcd3ae32a9b9e43d1   | 5 | 0.665479921351427 | FALSE |
| 621f0a4f8c2414b17f3b40434862a251  | 5 | 0.665479921351427 | FALSE |
| c504e0ca94534572016a31761f44776b  | 5 | 0.665479921351427 | FALSE |
| 9b1a22ceee6ecfbd684d46412f9dc49   | 5 | 0.665479921351427 | FALSE |
| 3bd445c971cbfbd4d6f12c07a68deec7  | 5 | 0.665479921351427 | FALSE |
| 72cef79e08aeb54df80915bab3ee3c01  | 5 | 0.665479921351427 | FALSE |
| 694ee281b908e4bfcbeb8d88584224367 | 5 | 0.665479921351427 | FALSE |
| 805599865882c8802a1ebbc3d539b68a  | 5 | 0.665479921351427 | FALSE |
| bc4de31fa467e0b792b58e230e7cee7a  | 5 | 0.665479921351427 | FALSE |
| 51716d6182efdb29a158fe9562c83312  | 5 | 0.665479921351427 | FALSE |
| 71ad47c3b8cca9e31443d2370f72b32f  | 5 | 0.665479921351427 | FALSE |
| d60a0925b76d5201afe16641d9cc1992  | 5 | 0.665479921351427 | FALSE |
| 2f267743f640a6790a563ddfbd2b647   | 5 | 0.665479921351427 | FALSE |
| d5c502312559578912b7c07f862f08a7  | 5 | 0.665479921351427 | FALSE |
| d473f30bb25b09ce020fab5b7f4ce14a  | 5 | 0.665479921351427 | FALSE |
| a05f9f73ca792d7702b8dc6521d169b6  | 5 | 0.665479921351427 | FALSE |
| 99ffc98aa2402b754b593ee3769ceb1   | 5 | 0.665479921351427 | FALSE |
| 382e9f4d997c89d86390ff1db5eac316  | 5 | 0.665479921351427 | FALSE |
| 1e5a5b3bc1ec5dcac873a685e4efed1d  | 5 | 0.665479921351427 | FALSE |
| 448092b5340d77b71bc09f3b5f6ba580  | 5 | 0.665479921351427 | FALSE |
| 90ce0670d0c5674699a2cd54638a8f13  | 5 | 0.665479921351427 | FALSE |
| db6999c4df54a3eee3136c6671fa3517  | 5 | 0.665479921351427 | FALSE |
| 0b22ed48eb3acaf7d1d9721c8b83cbdf  | 5 | 0.665479921351427 | FALSE |
| 69a0a9b3d2f25e615792f49a88477b76  | 5 | 0.665479921351427 | FALSE |
| e738239f47d0c43f0d59b1bbd3e5b262  | 5 | 0.665479921351427 | FALSE |
| cb16531b22a650335c98dcd66c2dafd   | 5 | 0.665479921351427 | FALSE |
| 84ec1399e8ee3618cc0686f28b89dbcb  | 5 | 0.665479921351427 | FALSE |
| b5b5ccf8d4b597516a51069273afe7c8  | 5 | 0.665479921351427 | FALSE |
| 8ecb3c546a958d83e04d925a962af7f6  | 5 | 0.665479921351427 | FALSE |
| 9ef7688ddcbba5179a5011ec2c64a228  | 5 | 0.665479921351427 | FALSE |
| 08bb29e76019a1d1ab85c15f745c3b07  | 5 | 0.665479921351427 | FALSE |
| f2c5e1386e7119686922dadcc0904088  | 5 | 0.665479921351427 | FALSE |
| 6552f4787f1b6115bf9c9cf04a0b836d  | 5 | 0.665479921351427 | FALSE |
| 9cb31a8163c8b8dc83dbd589443f06e1  | 5 | 0.665479921351427 | FALSE |
| 96145f0f0d8025639c22921be63a5696  | 5 | 0.665479921351427 | FALSE |
| be5ee53525a2da4275c32880c374493   | 5 | 0.665479921351427 | FALSE |
| 933096a8abba3ba26115619300c7b569  | 5 | 0.665479921351427 | FALSE |
| 13e78875b36fe62a172099127b50eca7  | 5 | 0.665479921351427 | FALSE |
| 213125af63c3c90e20e0e9e71cf103e5  | 5 | 0.665479921351427 | FALSE |
| d32ab6db74a0b97252425a6b4d99b4a9  | 5 | 0.665479921351427 | FALSE |
| 3fa9b1137ccd47fc0b8a5960215cd91d  | 5 | 0.665479921351427 | FALSE |
| b5ca209c65510a1622f68fa535441443  | 5 | 0.665479921351427 | FALSE |
| e747688049d7059f0721a86f541a58aa  | 5 | 0.665479921351427 | FALSE |
| fcdf3e1e3fd860c9a76a22fe6da59882  | 5 | 0.665479921351427 | FALSE |
| 7ef97632ab2d719134190b64d0e20481  | 5 | 0.665479921351427 | FALSE |
| 8c69b52248230f6661f7718a1dff9f26  | 5 | 0.665479921351427 | FALSE |
| 5c2fe78d3aa8a5952c3261269b857cc1  | 5 | 0.665479921351427 | FALSE |
| 3bdf3962a4d6b9738dc1bfa095f6cc8e  | 5 | 0.665479921351427 | FALSE |
| d0099ee91dbd9830ee9ca8100ee85747  | 5 | 0.665479921351427 | FALSE |
| 93da342980ee5d7587028b142860e326  | 5 | 0.665479921351427 | FALSE |
| f8bfa38966ea4a31ede4d309eff80d6f  | 5 | 0.665479921351427 | FALSE |
| 1a7a8f466b74b6b5e3497d10112cda38  | 5 | 0.665479921351427 | FALSE |
| 0e86e0627c7da65f03262253a0f36a37  | 5 | 0.665479921351427 | FALSE |
| 5f8fcfd5eae442ef695287a85c782c5d  | 5 | 0.665479921351427 | FALSE |
| b3f501eb848286a3758e9ce88eb51d01  | 5 | 0.665479921351427 | FALSE |
| c9afd558a3687a3ab1cb10e0979c6e26  | 5 | 0.665479921351427 | FALSE |
| f795c30a2d4c83ad90760a26b8948100  | 5 | 0.665479921351427 | FALSE |
| 763da75108822f3211c6f8852fecb09d  | 5 | 0.665479921351427 | FALSE |
| Oea5e1ee42a9add6e20e4cea1e13e61b  | 5 | 0.665479921351427 | FALSE |
| fc16f182cda13158b7b53b99ec439473  | 5 | 0.665479921351427 | FALSE |
| 937130634699adf772e663b3206296108 | 5 | 0.665479921351427 | FALSE |
| 684661c135c9eac8d14167f4c0f04940  | 5 | 0.665479921351427 | FALSE |
| a2a66718d4e7cf14e217a7f6fd99900d  | 5 | 0.665479921351427 | FALSE |
| 25b00fbc430d7f939bd949e6460a84dd  | 5 | 0.665479921351427 | FALSE |
| 84a73b80b8405e0dd723cf9f218acbc   | 5 | 0.665479921351427 | FALSE |
| e5ba1449f96ae19c21538f0ebf01b59e  | 5 | 0.665479921351427 | FALSE |
| 2deee102fe6514204af2bf0780bc1ac4  | 5 | 0.665479921351427 | FALSE |
| b987b751d2357f99e82610cc984b09e9  | 5 | 0.665479921351427 | FALSE |
| 5e6725e17a517802fd48cba3bc05c1c   | 5 | 0.665479921351427 | FALSE |
| 2fc9b7df35cf9b721acedcd9d3561cce  | 5 | 0.665479921351427 | FALSE |
| 23a7b18fbefa1fa371830e7db7876b29  | 5 | 0.665479921351427 | FALSE |
| 62a87d4db851644446615062d61d09e7  | 5 | 0.665479921351427 | FALSE |
| 99d5a4ffa07fc3904d57784b335f19bd  | 5 | 0.665479921351427 | FALSE |
| f0b16686cde37268349599e11a1f8790  | 5 | 0.665479921351427 | FALSE |
| 934f56716628cf3758baa5e7b702d2a1  | 5 | 0.665479921351427 | FALSE |
| 05583e0e12ac4607a40b2f17ce39e18   | 5 | 0.665479921351427 | FALSE |
| aec20e1a147e3f84f9794c1b9066aae4  | 5 | 0.665479921351427 | FALSE |
| 3b09d01fdbc5a425b7e984a53f59a9d8  | 5 | 0.665479921351427 | FALSE |

|                                   |     |                   |       |
|-----------------------------------|-----|-------------------|-------|
| 4581c03a9fbf22ca8d26d197945c5d06  | 5   | 0.665479921351427 | FALSE |
| 0e089dac21915d34e1ba6011443df2e9  | 5   | 0.665479921351427 | FALSE |
| 09b47236ecdcb4627b4f19dadfb2867   | 5   | 0.665479921351427 | FALSE |
| 57706cd140992bbd0d4e96a833912f45  | 5   | 0.665479921351427 | FALSE |
| 0d2a4db996f43b65f6249c118c8d424c  | 5   | 0.665479921351427 | FALSE |
| 1dee7a9043af345aeb0c01ef1f4473ae  | 5   | 0.665479921351427 | FALSE |
| 0f21e6a5615139dabd413632d1378dc6  | 5   | 0.665479921351427 | FALSE |
| 9bf47859277b18f7164e848576d8829f  | 5   | 0.665479921351427 | FALSE |
| 9243a3b81d2e0ffe7466f757fecb47f   | 5   | 0.665479921351427 | FALSE |
| 687bb3b3b1b09601bd3a0ac6eeca4f46f | 5   | 0.665479921351427 | FALSE |
| dff5823839d97156151935cda410bb6f  | 5   | 0.665479921351427 | FALSE |
| d6eb49be064bb019a8dbb28451f649c3  | 5   | 0.665479921351427 | FALSE |
| 0bab6eefa020ad40122cff733972d7f3  | 5   | 0.665479921351427 | FALSE |
| 7b732016b53fc4c4128273ac1c83fae2  | 5   | 0.665479921351427 | FALSE |
| 6875c5259a37bc8844c092db19fec963  | 5   | 0.665479921351427 | FALSE |
| 1a2d11c18878fcdf1192fb22e7e45a93  | 5   | 0.665479921351427 | FALSE |
| 637acbf700723da791ff8b1554634740  | 5   | 0.665479921351427 | FALSE |
| 4fe609069ddb659da47531c688130164  | 5   | 0.665479921351427 | FALSE |
| 7b897f5ab602ed700ec9c10d96fb997   | 5   | 0.665479921351427 | FALSE |
| 1b097ec2f993f8d93f006bdd6499a2b9  | 5   | 0.665479921351427 | FALSE |
| 3615fb777005e792f48281d9766a159a  | 5   | 0.665479921351427 | FALSE |
| 0b49776f60bc0f566ebe8585ec3c5e07  | 5   | 0.665479921351427 | FALSE |
| c45fba966a7c86503b38a13e121fad0a  | 5   | 0.665479921351427 | FALSE |
| e39d0106129d2cef95d226ab68163276  | 5   | 0.665479921351427 | FALSE |
| 69e91084b18e0bcb7404b6a55fc3b17f  | 5   | 0.665479921351427 | FALSE |
| e30af441c32096bbff179e10a8080c75  | 5   | 0.665479921351427 | FALSE |
| a3fdee62edf9cb50662e84281124a241  | 5   | 0.665479921351427 | FALSE |
| 12b3baee9905c9965794265d3f8511e   | 5   | 0.665479921351427 | FALSE |
| 306a0dc859c17f4586aac1cbef4f7d45  | 5   | 0.665479921351427 | FALSE |
| af7584c5080425da5c5b2bf7a2045749  | 5   | 0.665479921351427 | FALSE |
| 8fea6fb414f3973c60bb3d9c9b396391  | 5   | 0.665479921351427 | FALSE |
| 858e61f4b80d4c21c57fb23e4adf00b9  | 5   | 0.665479921351427 | FALSE |
| f42fa1f361123808c5170776beea4f28  | 5   | 0.665479921351427 | FALSE |
| a3d55180faf1984a6ecd4e4cf7cd9621  | 5   | 0.665479921351427 | FALSE |
| 833e68d8409bfd00f147d62868285d    | 5   | 0.665479921351427 | FALSE |
| bada4b4d5ec4bb02547d109017bddbf6  | 5   | 0.665479921351427 | FALSE |
| 1de11ca9bfc49d2a24f3217092474de5  | 22  | 0.676227110786361 | FALSE |
| e5d49fa90328817f763cd8e8f5b0eab1  | 22  | 0.676227110786361 | FALSE |
| 6da46d83d8eca17871b9937d084ea890  | 22  | 0.676227110786361 | FALSE |
| bab727aead750abea99848d1f7b760d7  | 71  | 0.678242374515425 | FALSE |
| 3b482b3f9da81db80a221a66031aa159  | 113 | 0.684135587722467 | FALSE |
| 476738e317c846bab51ab3cbefc92f1d  | 6   | 0.691475346686081 | FALSE |
| 39ca85a8156900264d039677c05ca2e8  | 6   | 0.691475346686081 | FALSE |
| db0a9bba4758c990e4d72f8558596479  | 6   | 0.691475346686081 | FALSE |
| c00181a21a8c5b8b22d1b2793f6dfb3   | 6   | 0.691475346686081 | FALSE |
| 0984f915f803bc5c24bf8e1c909ab5ca  | 6   | 0.691475346686081 | FALSE |
| 81d51386cb12c21a2f27ebdd8b9b2ccc  | 6   | 0.691475346686081 | FALSE |
| 375f634194a84d8e75ae82cf5a65769f  | 6   | 0.691475346686081 | FALSE |
| 642cd6c8b3c6a14c90307513a1249ea7  | 6   | 0.691475346686081 | FALSE |
| ff4647415dcccadee59cb477abc5de829 | 6   | 0.691475346686081 | FALSE |
| 771eef8a8acb8fe4bab03d049dd070fa  | 6   | 0.691475346686081 | FALSE |
| fc48628625c6ec016a4d57e4e6d3d5af  | 6   | 0.691475346686081 | FALSE |
| a810d316616fb1a7321351393c70ae70  | 6   | 0.691475346686081 | FALSE |
| 42adb322e812d7d110c13bc5c582464f  | 6   | 0.691475346686081 | FALSE |
| f54538c9fe78a2491a7365d46ac7d04a  | 6   | 0.691475346686081 | FALSE |
| 5440bb497433d6fb4d592fc9dc4115fc  | 6   | 0.691475346686081 | FALSE |
| 846d9bb062cdef518cf911cb5f2f48e   | 6   | 0.691475346686081 | FALSE |
| bfd5a200f7cbc8ed661fb5e5659b809e  | 6   | 0.691475346686081 | FALSE |
| d7d8e9ca0bb47e48bb7b11010bf44cd9  | 6   | 0.691475346686081 | FALSE |
| 19032423b2abbba6747425ffe54db960  | 6   | 0.691475346686081 | FALSE |
| 24578f723e54aac8e9d917365bfc8d87  | 6   | 0.691475346686081 | FALSE |
| cf82d65756dce349e1df6b64ab983821  | 6   | 0.691475346686081 | FALSE |
| 9c6f2b50ecee1d000f4981af2d9ab517  | 6   | 0.691475346686081 | FALSE |
| b7a90c7afe20bf32a35c949e18984553  | 6   | 0.691475346686081 | FALSE |
| 2cfc396eb5f251d5f5142811640f757   | 6   | 0.691475346686081 | FALSE |
| 128494a261f2bae571bb1058b52c687a  | 6   | 0.691475346686081 | FALSE |
| b493b2e590a925aa8aa5e8e5ef559dfd  | 6   | 0.691475346686081 | FALSE |
| 6645ac6e01b54dbf89dcb1a3515e387f  | 6   | 0.691475346686081 | FALSE |
| eeb6eda609da001bc1cda61fcd1f67b   | 6   | 0.691475346686081 | FALSE |
| 0fc819b99aeaa0ffa6d9db40378b17    | 6   | 0.691475346686081 | FALSE |
| d89b8bf4cf0e4e17fe46c0d214238584  | 6   | 0.691475346686081 | FALSE |
| 20ed485a649cc0f03dd3cf2b9a488a22  | 6   | 0.691475346686081 | FALSE |
| 74df131c4c31e7469f7f1f4d93cf57d   | 6   | 0.691475346686081 | FALSE |
| 64a76d1d022bade634287ace4305d5c4  | 6   | 0.691475346686081 | FALSE |
| 99b0ace8f5564cc9f51d62e073d1389f  | 6   | 0.691475346686081 | FALSE |
| c05eef21fa88381de2bcb04b003bcad6  | 6   | 0.691475346686081 | FALSE |
| 38e37205b8f101040fafa39445a00687  | 6   | 0.691475346686081 | FALSE |
| 7e28ca07fa82d553ff3e2eb951f96b1e  | 6   | 0.691475346686081 | FALSE |
| 2862752121447c336cdaee1089c3bf9d  | 6   | 0.691475346686081 | FALSE |
| cfeaa32bd4779c561a79d9ca35a8a21   | 6   | 0.691475346686081 | FALSE |
| d6a07a207695e918c576157088e00158  | 6   | 0.691475346686081 | FALSE |
| 69d658abc0bc72ff78e01244a0620d0   | 6   | 0.691475346686081 | FALSE |

|                                  |    |                    |       |
|----------------------------------|----|--------------------|-------|
| 78c77fe65ef85f77876913afafaf83ca | 6  | 0.691475346686081  | FALSE |
| 21f57b10a24af2d07ef8bb29fde77308 | 6  | 0.691475346686081  | FALSE |
| fbe1441247a95ff2154e296ce755b02  | 6  | 0.691475346686081  | FALSE |
| 19faab0613301c627436bea7ba130c03 | 6  | 0.691475346686081  | FALSE |
| c372b43be47a60debbdb8ba64f5c4f3b | 6  | 0.691475346686081  | FALSE |
| 4281f5b1a9d4da51b4f84a86734e3016 | 6  | 0.691475346686081  | FALSE |
| 33fb7c931529eaff0ba2653fe5e55a4  | 6  | 0.691475346686081  | FALSE |
| 54eaa3dad1c82a5c1a864cb36dfa00a8 | 6  | 0.691475346686081  | FALSE |
| 09654246eee58793bd55f4f2e8866c94 | 6  | 0.691475346686081  | FALSE |
| 1554445ec0f58f8f3aa89d4c19f6ca5  | 6  | 0.691475346686081  | FALSE |
| 725c3ce493fc20f290177b3cd00ac157 | 6  | 0.691475346686081  | FALSE |
| d17be2e7da52698326ae236a7e80bf0c | 6  | 0.691475346686081  | FALSE |
| 5f8ae198552bc39633ea5c3962946313 | 6  | 0.691475346686081  | FALSE |
| 07b2282aba42b7a552743011db8094f6 | 6  | 0.691475346686081  | FALSE |
| 3e9db007ba1ad11c10840b072cf82ac9 | 6  | 0.691475346686081  | FALSE |
| ba2abd56e0c62e84a281b252c0ecf2c4 | 6  | 0.691475346686081  | FALSE |
| ac58e247b4b4dc9952a63a8768842531 | 6  | 0.691475346686081  | FALSE |
| f0c33566b57c73834e6715e4f843280f | 6  | 0.691475346686081  | FALSE |
| 3447bba88a77090a6e1f60be2df80a8d | 6  | 0.691475346686081  | FALSE |
| c9495d05babd9ff3d12861c52ac48b10 | 6  | 0.691475346686081  | FALSE |
| cf1c154dda5617a313977704c70b4fea | 6  | 0.691475346686081  | FALSE |
| 665c06c0446675030ffb92788fbc2972 | 6  | 0.691475346686081  | FALSE |
| de755d7719f17159286b670fb8ec8452 | 6  | 0.691475346686081  | FALSE |
| f4009a122f9d6677ef2cc595ac70db1  | 6  | 0.691475346686081  | FALSE |
| 023f6419e31912178c881067c038cbe8 | 6  | 0.691475346686081  | FALSE |
| 0ba7ab54477ac1e358b95b12ae47cfd  | 6  | 0.691475346686081  | FALSE |
| e5efb19c8e76cad58107d2acd1913b91 | 6  | 0.691475346686081  | FALSE |
| 282cf87787bf8bc13d8469ce93ea9a83 | 6  | 0.691475346686081  | FALSE |
| 37593875f248af0a9f8a410adae37818 | 6  | 0.691475346686081  | FALSE |
| e53ed171ef0054d5828f13109e670473 | 6  | 0.691475346686081  | FALSE |
| 0122b585024361ddaee2c8d00f210974 | 6  | 0.691475346686081  | FALSE |
| 88a665d3728e9f8cb9660a1ce9b3c3bf | 6  | 0.691475346686081  | FALSE |
| 05e59e6acfa67481514206aea60b5817 | 6  | 0.691475346686081  | FALSE |
| ce83fcf423e41adb5b0ed8d2efc692b  | 6  | 0.691475346686081  | FALSE |
| 9c23f56aa5a85f3d6ff72ab45dd6a8eb | 6  | 0.691475346686081  | FALSE |
| e6bb8eaaac8196675f99a78761aefab9 | 6  | 0.691475346686081  | FALSE |
| 6bc1b948bdac137349310bd8e6822f34 | 6  | 0.691475346686081  | FALSE |
| e41b96f0ca69f99a45f8985d840fde43 | 6  | 0.691475346686081  | FALSE |
| 4202b2ba3e89e89d60d5e1657251a277 | 6  | 0.691475346686081  | FALSE |
| 3a75c7fcc9371c1129d5e490067b5473 | 6  | 0.691475346686081  | FALSE |
| 302e745422686c8b40fecf517ec856ca | 6  | 0.691475346686081  | FALSE |
| d1cb4ea8ba58a5e6d1be97779e72dd3b | 6  | 0.691475346686081  | FALSE |
| 5b115c09c95c3a6b956d53d2f1884614 | 6  | 0.691475346686081  | FALSE |
| fac0a19f742f17a596e1554f6f94542e | 6  | 0.691475346686081  | FALSE |
| 92ea3b676285053413ddb4f880f2a4d5 | 6  | 0.691475346686081  | FALSE |
| 8f339184fac227ee4142a3554f5cc64f | 6  | 0.691475346686081  | FALSE |
| f2b214c47f5b29b3edb289a3fd95dca  | 6  | 0.691475346686081  | FALSE |
| 1e85713d0ee4b69c1ba7b57fecce1e7e | 6  | 0.691475346686081  | FALSE |
| 1ae8041320c459acb58d90d8a1b346   | 6  | 0.691475346686081  | FALSE |
| f44603f6b65d6c112a977783a13461f5 | 6  | 0.691475346686081  | FALSE |
| 8de8c318baec968219319f50f648af60 | 6  | 0.691475346686081  | FALSE |
| 67e330de0289f13cf25c1f4ac71dbf19 | 6  | 0.691475346686081  | FALSE |
| 9729d58a6a7dd9ddc2d0977cc7b68cf  | 6  | 0.691475346686081  | FALSE |
| 2bbafcdaf6ea1b9cbbc86104090b6bf8 | 6  | 0.691475346686081  | FALSE |
| 64485352a43d56f50f1b3a5f3167b0a4 | 6  | 0.691475346686081  | FALSE |
| 1509e5bbabd9d1c71b407a0ac218e46b | 6  | 0.691475346686081  | FALSE |
| a5dcc6de4c99de98137e828069413f13 | 6  | 0.691475346686081  | FALSE |
| 04e24a19d69d50187392f3b293672907 | 6  | 0.691475346686081  | FALSE |
| 9da052e6c59fcdcf34e1afb8be9933f  | 6  | 0.691475346686081  | FALSE |
| abbdde2546c73e95a40fa010995d2818 | 6  | 0.691475346686081  | FALSE |
| 29cfe68fe8b380a7be28a396d32cb6ab | 6  | 0.691475346686081  | FALSE |
| 725fdb050bbeefec541866c137e9c50a | 6  | 0.691475346686081  | FALSE |
| eb2594d058017aaba416b552608fa95f | 6  | 0.691475346686081  | FALSE |
| 8115bfcd03a0ef73ed285dc9716fc0f5 | 6  | 0.691475346686081  | FALSE |
| b62deda5ed36b8c96b0acc4011f0001a | 6  | 0.691475346686081  | FALSE |
| 9f6e744b36e913bb4649329926fbfee2 | 6  | 0.691475346686081  | FALSE |
| 96714a6842a401aa4fecabff7a334c5f | 6  | 0.691475346686081  | FALSE |
| 2a7d7d28b641f4285a458ca5cfacd950 | 6  | 0.691475346686081  | FALSE |
| 6cc51fe5dd109eb6363c531f2ffb660  | 6  | 0.691475346686081  | FALSE |
| 3a228aeb41029dad281ee5d1ad796636 | 6  | 0.691475346686081  | FALSE |
| 511bf33ffff1bc6d33e8b7024543008d | 6  | 0.691475346686081  | FALSE |
| 8839f92e94f7eaa6b15070cdd3a35932 | 6  | 0.691475346686081  | FALSE |
| d04db31eb1abae895d806b53ef3e6d33 | 6  | 0.691475346686081  | FALSE |
| f018335ed27f4ebb1191e4b07133ba72 | 6  | 0.691475346686081  | FALSE |
| 8210bde00785df70ea9736d5be8363a  | 38 | 0.694321371129945  | FALSE |
| e73d7f3f0353d7c592d2e13108551f31 | 23 | 0.69531093863704   | FALSE |
| d881f447ded933c782b33f0ed029eb81 | 24 | 0.7134444141883855 | FALSE |
| 6df3a5390512a230ba46b8f69c083579 | 24 | 0.7134444141883855 | FALSE |
| 78bade5ebbe4174d8be9924c6185e63f | 7  | 0.715499807394952  | FALSE |
| 000653cdb81bc81c8296b722a5cfaa0a | 7  | 0.715499807394952  | FALSE |
| 849d52ff327105ded96e282fe1bd3b62 | 7  | 0.715499807394952  | FALSE |
| 35ff75125aac19c43b821d31def91a6  | 7  | 0.715499807394952  | FALSE |

|                                   |                       |       |
|-----------------------------------|-----------------------|-------|
| f6abd5e319f04daef391a2e5654004f   | 7 0.715499807394952   | FALSE |
| 30dbe645e8a27035b82f3e2724544d5e  | 7 0.715499807394952   | FALSE |
| 6e5b0b6f7e2bb31c463b644e85bde992  | 7 0.715499807394952   | FALSE |
| 6861dd72bd088689e5dfef66bf7e4135  | 7 0.715499807394952   | FALSE |
| 9c2ebf8f2921e2d7bb2e2270607342fa  | 7 0.715499807394952   | FALSE |
| 673173eec4db0acd7101cf10a16b6866  | 7 0.715499807394952   | FALSE |
| 18786531e995f35bfaf6938d96ec702   | 7 0.715499807394952   | FALSE |
| af6374578fd7c52c9e70103c558b23ad  | 7 0.715499807394952   | FALSE |
| 5606b84bea115e968c56e015ba80be07  | 7 0.715499807394952   | FALSE |
| 6047e1cd01fa98962f888d9f00cbfa6e  | 7 0.715499807394952   | FALSE |
| d1de072c491257d797a532babbf5764a  | 7 0.715499807394952   | FALSE |
| 15329d5033e2beb83d980271241d8308  | 7 0.715499807394952   | FALSE |
| d1cfb51391363f63a2a4dae00098c508  | 7 0.715499807394952   | FALSE |
| 9f7c2bd6ef46996c8c194978d581c879  | 7 0.715499807394952   | FALSE |
| 5ce34ff294c4eb73dddb425696c47c60  | 7 0.715499807394952   | FALSE |
| 4cad7317878ea3b34ff87a0aae89c58   | 7 0.715499807394952   | FALSE |
| 75dcf4386d37d4fc0f8d2e6b17ecab8a  | 7 0.715499807394952   | FALSE |
| 1579f92d06c86388b8afd5ff14a3b211  | 7 0.715499807394952   | FALSE |
| d7f2dea2af50786b71563ab7cd6eaa    | 7 0.715499807394952   | FALSE |
| 9f6d2c29406a1846e6da618176b1e21   | 7 0.715499807394952   | FALSE |
| cd46e01b7ade82713425c980e460e5ad  | 7 0.715499807394952   | FALSE |
| 426ca56efb6816b00bdf050ab01d0d0f  | 7 0.715499807394952   | FALSE |
| 24216962fb504c3ce0264bf24d1f9cb5  | 7 0.715499807394952   | FALSE |
| 84d7876514c79823177f54c6bad6c2b9  | 7 0.715499807394952   | FALSE |
| bb7baf63968d36cf1bfbd5fcd580ed70  | 7 0.715499807394952   | FALSE |
| 8b85eaaafd6c5e4b10a90a4a32790e4b  | 7 0.715499807394952   | FALSE |
| 5d9b474ea44d8ca1f55007f87e53a13c  | 7 0.715499807394952   | FALSE |
| a46eeca1b1204fe087c1f1f5b2e7cf55  | 7 0.715499807394952   | FALSE |
| 9b2e53b19d862d6826f6be3d423e618   | 7 0.715499807394952   | FALSE |
| 8181046c6027b76fecba11accf9efe8c  | 7 0.715499807394952   | FALSE |
| e95ef791d06b1d2f990345ee53ca21b8  | 7 0.715499807394952   | FALSE |
| d3a26f6c315d1c86b14b88e81af8e3fc  | 7 0.715499807394952   | FALSE |
| 5c6edb849229155a7f835f12505003fd  | 7 0.715499807394952   | FALSE |
| 93b6acf12ab28286f735e299fcd7e3e   | 7 0.715499807394952   | FALSE |
| 985c885e396f1e7ea883ebe31b3e3e66  | 7 0.715499807394952   | FALSE |
| 09595e80206d35b965f4cce02b2f48c3  | 7 0.715499807394952   | FALSE |
| 30658a6c43516aafec4b553b81e6b8d   | 7 0.715499807394952   | FALSE |
| 4ec764dc072f2f639a74752149d1b9ef  | 7 0.715499807394952   | FALSE |
| b6c6e727b8a2b38f3fe4236aab51182   | 7 0.715499807394952   | FALSE |
| d2851be2899896813406335f097e0766  | 7 0.715499807394952   | FALSE |
| 3b8a7748b36653caf4a339c462aaeace7 | 7 0.715499807394952   | FALSE |
| c219cba5ccdd765a396f14d20423f4f5d | 7 0.715499807394952   | FALSE |
| b3c39c59af5fea7457921f190fddf246  | 7 0.715499807394952   | FALSE |
| fddb21906df27ed56154006167998223  | 7 0.715499807394952   | FALSE |
| 2060cd013f6f8e1fdafa2e4fb5f9105c  | 7 0.715499807394952   | FALSE |
| 9068298bbfe44765abf5d4b36326b8f3  | 7 0.715499807394952   | FALSE |
| f07c42e5c7ba021de7b60091ed440e76  | 7 0.715499807394952   | FALSE |
| 09c3e7640cd22403cb1b069579db6645  | 7 0.715499807394952   | FALSE |
| cd615ef0610acbcfb4bafa1586ad08ee  | 7 0.715499807394952   | FALSE |
| e0287daf63905b8cf23ad925f12009b2  | 7 0.715499807394952   | FALSE |
| 6dd8a4fb3215ac145571b0079405a312  | 7 0.715499807394952   | FALSE |
| a116c09afca2ad940b8906ca4c225822  | 7 0.715499807394952   | FALSE |
| 8d8bd5de425b80441258f27801cd9f6   | 7 0.715499807394952   | FALSE |
| 75c37c29a6bc563618b656d63a21976b  | 7 0.715499807394952   | FALSE |
| f40ca23c1724abd681edb4205954c756  | 7 0.715499807394952   | FALSE |
| a8b203461e5cfead0462ac1dcfee07c0  | 7 0.715499807394952   | FALSE |
| 1c132342410d69d37d82a2aed3bfb05   | 7 0.715499807394952   | FALSE |
| dc41358fd306fc1053d80935c0ddf0b7  | 7 0.715499807394952   | FALSE |
| 073ce754d4fdbcb4e4828e63e4a6387fe | 7 0.715499807394952   | FALSE |
| 9bfc9ecb4864e67cd7d432a627d7fe11  | 7 0.715499807394952   | FALSE |
| a84ac8fc73810467a41d4b54da068bf0  | 7 0.715499807394952   | FALSE |
| 169fb216a12f673fcd8d8c5de35a82    | 7 0.715499807394952   | FALSE |
| 00d9ad4346446bcd2b34269f283f39ff  | 7 0.715499807394952   | FALSE |
| ee52da5d4bb76047ccf285398cad8f73  | 7 0.715499807394952   | FALSE |
| 978ba7cb1df2117169afd062d0dbe46   | 7 0.715499807394952   | FALSE |
| 71c9b7fd6b750486bdf5c59543b98a6e  | 7 0.715499807394952   | FALSE |
| f4d5b9520fb5e0c48fd3afb1fc9a5047  | 7 0.715499807394952   | FALSE |
| c65b7d39ebce1feb1d58e27aee1bca47  | 7 0.715499807394952   | FALSE |
| 9c439916915fd3dba65264406eb263ba  | 7 0.715499807394952   | FALSE |
| a91695ef6eb933fc1a78804ad848ca05  | 7 0.715499807394952   | FALSE |
| 5c046402b9d4eda1925b61e367712fbe  | 7 0.715499807394952   | FALSE |
| a4591400fc7d7ddf8843573260636cca  | 7 0.715499807394952   | FALSE |
| 1aa75dad1dee675701b42a805fb0d42b  | 7 0.715499807394952   | FALSE |
| a0999abb73d84e91d5134d80528ef229  | 7 0.715499807394952   | FALSE |
| 4d4c903ae6df84e7f79f9be3cecf19268 | 7 0.715499807394952   | FALSE |
| d0b698c7298bf04110a6d2f220879bfb  | 431 0.725498775526386 | FALSE |
| be895bf9176954ab8f55e2c2e1d4e047  | 25 0.730657519292985  | FALSE |
| 2ed220cab9db0862029af74d35ffaf4   | 25 0.730657519292985  | FALSE |
| d8cb744c811fa780dd595cf6df39bc60  | 25 0.730657519292985  | FALSE |
| 135727b4f47cd8732a2707eca12fcdcf  | 8 0.737699001068447   | FALSE |
| 170d6813dfbe0ce95dc78d234a5b7155  | 8 0.737699001068447   | FALSE |
| bd6e442e02ccd1c8d74c8632a93d3648  | 8 0.737699001068447   | FALSE |

|                                  |     |                   |       |
|----------------------------------|-----|-------------------|-------|
| 518b140a9a79e87da975636f1e42f403 | 8   | 0.737699001068447 | FALSE |
| e0de3364d91c93c955f117c62e66a9d6 | 8   | 0.737699001068447 | FALSE |
| 769de0c67929c3c1a4007c54642dfc34 | 8   | 0.737699001068447 | FALSE |
| b5e089a90fc5455638f85de23bb20993 | 8   | 0.737699001068447 | FALSE |
| 80098ec13d5319e6024df22a32d16bd  | 8   | 0.737699001068447 | FALSE |
| 49c5631b22e3c8af1bcf6caf37d3ff7d | 8   | 0.737699001068447 | FALSE |
| 62169a1df5dd845f1a7de084c2219327 | 8   | 0.737699001068447 | FALSE |
| 42322165cfa8b7b298ef6e3516d0f4a3 | 8   | 0.737699001068447 | FALSE |
| 97a36b566a19741b7e7ce108e99a678a | 8   | 0.737699001068447 | FALSE |
| 11b24486ce2911727bd082a6d0bd868b | 8   | 0.737699001068447 | FALSE |
| 6d8da19cf86ecb2c26f21b692f794071 | 8   | 0.737699001068447 | FALSE |
| Oca19cdac2fb9198a038aff1281a5e10 | 8   | 0.737699001068447 | FALSE |
| 18a5046a2252d72a8f9a425127ee63c4 | 8   | 0.737699001068447 | FALSE |
| b161a9890947c468aade8a7f27ccc163 | 8   | 0.737699001068447 | FALSE |
| a8b23d869d9990033ef96272f0fcf119 | 8   | 0.737699001068447 | FALSE |
| 6de665187bcc484ed4efad4465646a05 | 8   | 0.737699001068447 | FALSE |
| 69eb16a95fa594304be5c161c6b15c9e | 8   | 0.737699001068447 | FALSE |
| f14a4043d5ce3e764003e5fce86495e0 | 8   | 0.737699001068447 | FALSE |
| daaab96173b74ef79fd1aef40e9457b  | 8   | 0.737699001068447 | FALSE |
| 3016b2fab82ed08fb5585b175919df6  | 8   | 0.737699001068447 | FALSE |
| d2ad8ffb9c564a7a919a6d2c2ea25bb4 | 8   | 0.737699001068447 | FALSE |
| 1b6acfec1f1d9d018036a1e275703706 | 8   | 0.737699001068447 | FALSE |
| 67fd3a3f3f8db748efbe268136dfbde  | 8   | 0.737699001068447 | FALSE |
| 4ce4c3a69273ce1cc8fd219da9b381d4 | 8   | 0.737699001068447 | FALSE |
| 11c23f6cbbddf03bd8e6224a9071fb43 | 8   | 0.737699001068447 | FALSE |
| f40c0d4d9e06093a5ada229490ba0568 | 8   | 0.737699001068447 | FALSE |
| 9ee2b7f0b9e9c362f67a773511bc0f8f | 8   | 0.737699001068447 | FALSE |
| 6232643e6f00d30f14f28555f4d3aeb3 | 8   | 0.737699001068447 | FALSE |
| bd51e684722285320e57f327eca15b6b | 8   | 0.737699001068447 | FALSE |
| 0789caf27bf5974dcea4d8031951972a | 8   | 0.737699001068447 | FALSE |
| 6d113989510223e4c6dbd981301f7212 | 8   | 0.737699001068447 | FALSE |
| 0522bfa94eba6ceddf15a808b6ae96b7 | 8   | 0.737699001068447 | FALSE |
| ae12d30bf4100c4d96adc3ca43677698 | 8   | 0.737699001068447 | FALSE |
| 233979536096fdadb5a84680c813451  | 8   | 0.737699001068447 | FALSE |
| 24df451d973741ec25daf4a0faabb381 | 8   | 0.737699001068447 | FALSE |
| a31bd41aba32e4789d6da6371e8a0351 | 8   | 0.737699001068447 | FALSE |
| 4cf9490af23af672d19005d40819f32a | 8   | 0.737699001068447 | FALSE |
| d9681b85947e3afdf94497149ef007f  | 8   | 0.737699001068447 | FALSE |
| 8817c9e2e994bf779d0d9871bfaab685 | 8   | 0.737699001068447 | FALSE |
| fc2be12ee7778a775c5e96a7e119d6d4 | 8   | 0.737699001068447 | FALSE |
| 4760118850e3bfedf4909d626f8ac75  | 8   | 0.737699001068447 | FALSE |
| 5ee7c51bcfa27a4b318bf90a7fb84c5  | 8   | 0.737699001068447 | FALSE |
| 5a300b9a353ac9001a36a58e3306a300 | 8   | 0.737699001068447 | FALSE |
| e6552817f250085328087b23ab0dc1a9 | 8   | 0.737699001068447 | FALSE |
| 085bc0620ad4765efb14c77f0959bdef | 8   | 0.737699001068447 | FALSE |
| f30c82900b5992c0322e1142908bbe21 | 8   | 0.737699001068447 | FALSE |
| 1c12865114a7479a355a5314a0962ff4 | 8   | 0.737699001068447 | FALSE |
| 5608c3e6c9de9ceb79610e7786bd0ac4 | 455 | 0.73908199478054  | FALSE |
| b39c338f5e964b6cb87e07f10badc6c4 | 26  | 0.746982706665468 | FALSE |
| 749e45bde9313270898b93b8c4becd90 | 26  | 0.746982706665468 | FALSE |
| e33b20a92e8323c00165fd246aa9a5ce | 26  | 0.746982706665468 | FALSE |
| e9c0e61a0dcfb70f290be826a755c503 | 9   | 0.758208132672148 | FALSE |
| b36996030f130f5113ee26664007dc10 | 9   | 0.758208132672148 | FALSE |
| 23a6b01030772ac2e83ffc6a9ec32215 | 9   | 0.758208132672148 | FALSE |
| 3e039130d1c5ce6ee3bf389b3e16a6c7 | 9   | 0.758208132672148 | FALSE |
| 3e78c2d4071900023caf060ad6e4aea3 | 9   | 0.758208132672148 | FALSE |
| c3a4eb91dcfb4532380498b716445ae3 | 9   | 0.758208132672148 | FALSE |
| 680be3278c6b80b1b8d60bbfca191947 | 9   | 0.758208132672148 | FALSE |
| dbd8c548553b3b93df3ac057d7d2cb56 | 9   | 0.758208132672148 | FALSE |
| eb872b492619292ca3b24e42f436f99c | 9   | 0.758208132672148 | FALSE |
| fb8f2032bbe5e226156ce9778d2509af | 9   | 0.758208132672148 | FALSE |
| 0c1c7ad5d0260ba6e3bdcc9590c3c2c8 | 9   | 0.758208132672148 | FALSE |
| 5322c1b4520bfe8d265dfc591df5a64d | 9   | 0.758208132672148 | FALSE |
| c3b153bdcbcb594c78f50e103ff2b2d  | 9   | 0.758208132672148 | FALSE |
| ad73f4ab37e8e5f7ab14dee5fd5c5ae  | 9   | 0.758208132672148 | FALSE |
| b2c3bb2ac840eba4aa8a9cd75f8bc4d6 | 9   | 0.758208132672148 | FALSE |
| 01080e9f6920e834dd4353e0006970be | 9   | 0.758208132672148 | FALSE |
| 0b974216c890cb7d7f1b671e54adc25d | 9   | 0.758208132672148 | FALSE |
| b34dc93f446851e20b7664594eefea4a | 9   | 0.758208132672148 | FALSE |
| 9422dfd782051bd35570c28bc5c811c7 | 9   | 0.758208132672148 | FALSE |
| 4ae9adef4e7cf64f39d31521ce36fe69 | 9   | 0.758208132672148 | FALSE |
| 6fc9ce36185f7f68f3a3e677c395f7fd | 9   | 0.758208132672148 | FALSE |
| dd1b70afcfca1df0f341790f1a2c1e1  | 9   | 0.758208132672148 | FALSE |
| cc89995866a6e6077eea2beb57f8a512 | 9   | 0.758208132672148 | FALSE |
| bf6225734b915ae3e034aaf5cab2fc2  | 9   | 0.758208132672148 | FALSE |
| a51bfff8dc3d75cc03636e70bbfaf47b | 9   | 0.758208132672148 | FALSE |
| 5281eb7b2a57c232332fddd223fe88f5 | 9   | 0.758208132672148 | FALSE |
| 0e7017c0ccd789c11023b2baaa6aab3b | 9   | 0.758208132672148 | FALSE |
| 35bbc323229797ab3654d3eb5d1dccb7 | 9   | 0.758208132672148 | FALSE |
| 50b02ed56e5bd7071bd7b387464838b7 | 9   | 0.758208132672148 | FALSE |
| 145042b121fb19b759c9a71cfd6c3b11 | 9   | 0.758208132672148 | FALSE |
| 070502fc07b0ab293ac6d73549d3b974 | 9   | 0.758208132672148 | FALSE |

|                                   |     |                   |       |
|-----------------------------------|-----|-------------------|-------|
| 2d88b9122b9b887f026e2147867bc8df  | 9   | 0.758208132672148 | FALSE |
| 8a6ff32f51d7c2b5feb3a3c4507ddbcd  | 9   | 0.758208132672148 | FALSE |
| f3382394a5a2e3263ec1b9462ea0b56   | 9   | 0.758208132672148 | FALSE |
| 393d85b4c2886b63cdb62e812d38b2af  | 9   | 0.758208132672148 | FALSE |
| 53d442e1e344ed5313bcc6bbd17496e2  | 9   | 0.758208132672148 | FALSE |
| 1e5faad8ce74f2172060dba245f52f96  | 9   | 0.758208132672148 | FALSE |
| b944e446e87fa7a72fe2cccb95deee14  | 135 | 0.762399939224698 | FALSE |
| 31fafc31f41c40a6477d2bc148624981  | 27  | 0.762451888237852 | FALSE |
| 62ef06b414289af582c84fd276bd945   | 27  | 0.762451888237852 | FALSE |
| 53be6d7e62277b36a2809a2301b96b9a  | 43  | 0.764801684642535 | FALSE |
| 23443f6140da99fd12fc5b0c4720a271  | 28  | 0.777097544572831 | FALSE |
| da6a820d6236082bbe9da8395ecc162   | 28  | 0.777097544572831 | FALSE |
| 6f2414f3216c719e8f1a44de9f625c94  | 10  | 0.777152650112269 | FALSE |
| 5e4049b68851f2ee269dcac5f0f90322  | 10  | 0.777152650112269 | FALSE |
| 09b48cd4c1f3fc619ba1f437dae36dcb  | 10  | 0.777152650112269 | FALSE |
| 11e23ea5f65f90c78651bcbe86b74191  | 10  | 0.777152650112269 | FALSE |
| 4c457a70243c649760a1811351afeb0c  | 10  | 0.777152650112269 | FALSE |
| 257b9d2aab382808563d7f42d38d6964  | 10  | 0.777152650112269 | FALSE |
| 75fab318c01fbc0d769ab98f3d328f12  | 10  | 0.777152650112269 | FALSE |
| f91246e65ef5f4a6eb9ffc444cba10f4  | 10  | 0.777152650112269 | FALSE |
| 0d0042373110580057296869406719fa  | 10  | 0.777152650112269 | FALSE |
| 38347f00c351f6a8b58265d41aaa725   | 10  | 0.777152650112269 | FALSE |
| 91101303b2fa23ed605482c99f27db6b  | 10  | 0.777152650112269 | FALSE |
| c8c110fa739e613f951fae412d6f9f1   | 10  | 0.777152650112269 | FALSE |
| 126c4c4926f559db383ec0b8320bfac2  | 10  | 0.777152650112269 | FALSE |
| e683f1888d6f1ab46f404be9a98d7a3e  | 10  | 0.777152650112269 | FALSE |
| fcda020e2366b6eb9a4f922739f4e6ab  | 10  | 0.777152650112269 | FALSE |
| 42813a7ac2260688d1e5def012a3bf78  | 10  | 0.777152650112269 | FALSE |
| bd51a40a24ebd30ef796a7d484fbcd55  | 10  | 0.777152650112269 | FALSE |
| dccb9df56eb71cad4bfff7ed8431a7552 | 10  | 0.777152650112269 | FALSE |
| f0f33d61309d8999591d129526908ddd  | 10  | 0.777152650112269 | FALSE |
| 33cdd6119240b68f35d70c12fc0aafa6  | 10  | 0.777152650112269 | FALSE |
| 32480562e8e85d61074673393aa0ec7b  | 10  | 0.777152650112269 | FALSE |
| 47adf6684fda1d186def383b96fee3c   | 10  | 0.777152650112269 | FALSE |
| 74d46334ea0cf84cc845e9b24cacc55a  | 10  | 0.777152650112269 | FALSE |
| c37fa601378354e8583bb4334eb4e041  | 10  | 0.777152650112269 | FALSE |
| addf1e3d60f6910392223e40dcfa898b  | 10  | 0.777152650112269 | FALSE |
| 106c1bcf09642488d48e631dc007f515  | 10  | 0.777152650112269 | FALSE |
| 4c476bff9c90e545caf25abf2433741   | 10  | 0.777152650112269 | FALSE |
| 627857f1adf233e328b08b9f4ac9b055  | 10  | 0.777152650112269 | FALSE |
| 6f5da0517a69410b3b7702e321396052  | 10  | 0.777152650112269 | FALSE |
| 7fba832c4a81a2dc868d445e56d77ec9  | 10  | 0.777152650112269 | FALSE |
| 73e59f5f5a61052a6e7255dd9a08aeca  | 10  | 0.777152650112269 | FALSE |
| 7a21c9fea813dd4d7670e06c88be9aa7  | 10  | 0.777152650112269 | FALSE |
| 70b3e46a9f56d2957a5da8bbcc4108cc  | 10  | 0.777152650112269 | FALSE |
| ad796ee030e064cce08108c72a91eeee6 | 10  | 0.777152650112269 | FALSE |
| 1b156a3626c51ee68eafec90c33e0734  | 95  | 0.780667151943677 | FALSE |
| b9d2c93750a12ff7981a77e82f6a1547  | 29  | 0.790952233328766 | FALSE |
| 4224ae75b61b4c9687df8ff56db506ee  | 29  | 0.790952233328766 | FALSE |
| d63133c757e4c822d016db3aaa83f83   | 11  | 0.794648929648909 | FALSE |
| 3044fec0f8b0b1e86e093d156925713c  | 11  | 0.794648929648909 | FALSE |
| d960f6eb68bf555c7af553d60d44c613  | 11  | 0.794648929648909 | FALSE |
| 8a3bcb66a63e718322795fb3cf5786ba  | 11  | 0.794648929648909 | FALSE |
| f52e34a07ff2e814f0950ea181cb271   | 11  | 0.794648929648909 | FALSE |
| 0c97cf0c7f9074bda3693bd7391dfd4   | 11  | 0.794648929648909 | FALSE |
| 1e7e1e01adb7640a6a7d607cb61de9ea  | 11  | 0.794648929648909 | FALSE |
| 6728d5bea5db1509d2bc27d229d9065a  | 11  | 0.794648929648909 | FALSE |
| c720ca5d5668c68cf397a7fc3dd7fc92  | 11  | 0.794648929648909 | FALSE |
| 7581960d6d42d279720a6e185de9891a  | 11  | 0.794648929648909 | FALSE |
| fd7410edb0e0122ad8c41680a0c8cf7f  | 11  | 0.794648929648909 | FALSE |
| eb30fe79ff2790662309c17e86b78943  | 11  | 0.794648929648909 | FALSE |
| d88a6c6c55c19b1066649b6d8e929f74  | 11  | 0.794648929648909 | FALSE |
| 7dd5364869a72d25f903f2a7fdd10feb  | 11  | 0.794648929648909 | FALSE |
| 1a8d886228576ed91c68865e528df502  | 11  | 0.794648929648909 | FALSE |
| 7e910a4671368a87833508c5b7e64b5c  | 11  | 0.794648929648909 | FALSE |
| fe93a26042d60e3601d4b58c7ffc3a80  | 11  | 0.794648929648909 | FALSE |
| 36fa43c25ed6c2d07c29e03e2894c586  | 11  | 0.794648929648909 | FALSE |
| 2f605121545021cba7fae075f514065   | 11  | 0.794648929648909 | FALSE |
| 88ad1024d096672da0ec59be76064479  | 11  | 0.794648929648909 | FALSE |
| c2815e98bbc9a5c26391b06e88536412  | 11  | 0.794648929648909 | FALSE |
| 34572a2307da886cbce2b191be5f213a  | 11  | 0.794648929648909 | FALSE |
| 2f36633f10f651dce4741ab9073fbc57  | 11  | 0.794648929648909 | FALSE |
| 859cd1dcd7e3525daa1e111756201de7  | 11  | 0.794648929648909 | FALSE |
| 72f332a962517e2081df0ebac4ce0e1a  | 11  | 0.794648929648909 | FALSE |
| 7aa55291042b0dc85bf66204aeecc5f3f | 11  | 0.794648929648909 | FALSE |
| 3fb2f665e9e58a2e7ad1fdd1ee77a271  | 11  | 0.794648929648909 | FALSE |
| 9a990c07962e2d34c24e789e2581217f  | 11  | 0.794648929648909 | FALSE |
| 3ec4481028596ce277448c7cb5385a74  | 207 | 0.796503292277668 | FALSE |
| 3da914834c78256cc61d1c1c470e4552  | 30  | 0.804048399611448 | FALSE |
| 045bb03f6292d0b36cd77c9e6c5c4020  | 30  | 0.804048399611448 | FALSE |
| 196a053b371610fff9ee00b66df0b4d35 | 12  | 0.810804914479843 | FALSE |
| cc351e8607640aefef66b8b1b35f44c   | 12  | 0.810804914479843 | FALSE |

|                                  |     |                   |       |
|----------------------------------|-----|-------------------|-------|
| 60f0a102e1b3118286adc774264b5b7d | 12  | 0.810804914479843 | FALSE |
| 88b3d853bf0ae026c108316bdbf7516d | 12  | 0.810804914479843 | FALSE |
| 88f8c0389e4c0872fbee3232ebc0eb5d | 12  | 0.810804914479843 | FALSE |
| c2c99e10b5956b9c6b87131faf3a9467 | 12  | 0.810804914479843 | FALSE |
| 1590cb24d34f240f939466c1bca211e1 | 12  | 0.810804914479843 | FALSE |
| 3678d89e46e36d2dc9cdd1a84955bdb4 | 12  | 0.810804914479843 | FALSE |
| a6ac3b4cd416b6f921f702db706730f4 | 12  | 0.810804914479843 | FALSE |
| 4d350a5bdf32548e11848a818277b8c2 | 12  | 0.810804914479843 | FALSE |
| 17473586f4b889c05139cc72c2e8062e | 12  | 0.810804914479843 | FALSE |
| db4c8dc0512e585410924ee31218577b | 12  | 0.810804914479843 | FALSE |
| e556ee5150ea74092458189357186622 | 12  | 0.810804914479843 | FALSE |
| 305ab46bc50af8c9b04a52005224274f | 12  | 0.810804914479843 | FALSE |
| 6165cf874bd70cc64dd43f05eeef2264 | 12  | 0.810804914479843 | FALSE |
| 00a7b0037094adc4a8f638508824284b | 12  | 0.810804914479843 | FALSE |
| 958362b80eb527e5d99cfc14727a45a8 | 12  | 0.810804914479843 | FALSE |
| 32891522d68b23b9fbf71520146d04d  | 12  | 0.810804914479843 | FALSE |
| b7dafc10c238527a63f20df8257221eb | 12  | 0.810804914479843 | FALSE |
| 3be4093633164903309652a5ee96300f | 12  | 0.810804914479843 | FALSE |
| 0ac81f5b1143565c25fd8deb4206e8   | 12  | 0.810804914479843 | FALSE |
| 2d30c2c53fd94f63d88b136d45aca3b0 | 12  | 0.810804914479843 | FALSE |
| 0251c873b9e6e76973408b336adeb8b2 | 12  | 0.810804914479843 | FALSE |
| 43bafcbff59dcf1ac8758da64ef9b5bc | 31  | 0.816418212900771 | FALSE |
| 8d5e9411bb401bbf42175d0fd956d125 | 31  | 0.816418212900771 | FALSE |
| 3861ee62617a071584eabec1162b5126 | 31  | 0.816418212900771 | FALSE |
| 1b29cef84de6cbd9cd52eb9dbaa7fe7d | 31  | 0.816418212900771 | FALSE |
| 9b9a1ae38e23758a979eed98d5f06dc9 | 13  | 0.825720709603839 | FALSE |
| e7de984e21341b13ac754739096343b2 | 13  | 0.825720709603839 | FALSE |
| e95ab89ff87282bb7ebfb109bb235db9 | 13  | 0.825720709603839 | FALSE |
| 7a17d452d41caf71ea4de6188dff66e  | 13  | 0.825720709603839 | FALSE |
| a0f355228c2bc92f7151668f1fc71558 | 13  | 0.825720709603839 | FALSE |
| 581add769634c1bb41fe0eac84da9423 | 13  | 0.825720709603839 | FALSE |
| a6e12567a5a8ff604652fed640545653 | 13  | 0.825720709603839 | FALSE |
| 047c596149ab5e1e62eb9341525b0276 | 13  | 0.825720709603839 | FALSE |
| a8146cf9c7c06aec25a563142d473b10 | 13  | 0.825720709603839 | FALSE |
| 4b36eec432ef4ffb3464a8a0a9eafee3 | 13  | 0.825720709603839 | FALSE |
| 5d55c5aaab36a98540bcd71cf23696b1 | 13  | 0.825720709603839 | FALSE |
| c606ef358bc6506aca4c4b89cc56e45e | 13  | 0.825720709603839 | FALSE |
| 6fdb0a43d61c08d2d4e244d97a48e9f2 | 13  | 0.825720709603839 | FALSE |
| 91702465b934d02c76f76cfdabdf946  | 13  | 0.825720709603839 | FALSE |
| 997eb2712b5cb0cec6f883c8f2fb31b0 | 13  | 0.825720709603839 | FALSE |
| 92c64b7632c36c15c97dec4597f4f72  | 13  | 0.825720709603839 | FALSE |
| 475abf5e533ed261100a794ba2b5f8ec | 13  | 0.825720709603839 | FALSE |
| 34c94d66644c9e3e641a5040c3113f72 | 13  | 0.825720709603839 | FALSE |
| a926e9cb66778a8c6c548877d9e204b  | 13  | 0.825720709603839 | FALSE |
| c3018532c596c385e1f4cd12b2d3fe8d | 13  | 0.825720709603839 | FALSE |
| 52dcfdea4e1a3fe11524ecdab6df475d | 13  | 0.825720709603839 | FALSE |
| 55166f0153519210b5f9ee37f47f518d | 13  | 0.825720709603839 | FALSE |
| 4f10e321d38c10ef2b7a144f41da7d91 | 13  | 0.825720709603839 | FALSE |
| edb6db65965a970c9eab814177f21796 | 13  | 0.825720709603839 | FALSE |
| be6838d85b6c9b7429f1f7f4879c1d28 | 13  | 0.825720709603839 | FALSE |
| f3325b6c39cd939584b540aa9894f1d5 | 13  | 0.825720709603839 | FALSE |
| e19ce815c8643b851715aba05acf960b | 72  | 0.835326575452095 | FALSE |
| 243efcb3cb4808110c65c8176347c6ea | 33  | 0.839105266188764 | FALSE |
| b98f8c87cd3159b66ec0a418919be624 | 14  | 0.839489135872143 | FALSE |
| 4d02c00f27d2b0369cae8697f8aa74e0 | 14  | 0.839489135872143 | FALSE |
| 804da4953d5a3c2dec62eeaaaf77dbb  | 14  | 0.839489135872143 | FALSE |
| e54de8f948e4f1d2a3c9e5a394c5bc37 | 14  | 0.839489135872143 | FALSE |
| 7c664e537af176112682a9792e06e757 | 14  | 0.839489135872143 | FALSE |
| dbb77ef1903ce7b239d6c65a83ad3f3  | 14  | 0.839489135872143 | FALSE |
| 7d8a38181893e5747a2b6c5a1be1b9d3 | 14  | 0.839489135872143 | FALSE |
| d9d7d7b8bf24da8102e83469458682bb | 14  | 0.839489135872143 | FALSE |
| 6f3994ea8e29e64aa02df14a2846a8f6 | 14  | 0.839489135872143 | FALSE |
| 5655eff59411150b46cf6f2d75b35308 | 14  | 0.839489135872143 | FALSE |
| f30cd40fb114ab501e51f2f8aa202e14 | 14  | 0.839489135872143 | FALSE |
| b5df6b3e09aba5b4c07aaa7690198885 | 14  | 0.839489135872143 | FALSE |
| 670ab9f3126df45d2280c6d68eb6724d | 14  | 0.839489135872143 | FALSE |
| 61e1d16b27c60bdf7b9d4a61877b777  | 14  | 0.839489135872143 | FALSE |
| 46bd431314d551a4394037b4b0e5f9da | 14  | 0.839489135872143 | FALSE |
| 18430608bf7e39c8866f4592dae12694 | 14  | 0.839489135872143 | FALSE |
| 8f2f800e4a8e5c41bed76dbcb81203b8 | 14  | 0.839489135872143 | FALSE |
| d5a541cd845afa61ac26e362a9368819 | 14  | 0.839489135872143 | FALSE |
| 6b32fa82cd34029494b5351fe148c7f7 | 146 | 0.843871452255949 | FALSE |
| ff4ae0f811e8dcb2d76d7d8acc73deb8 | 132 | 0.844381485294231 | FALSE |
| 23d922f2b3e9315c90bb4189ba7f7f52 | 34  | 0.849484318274827 | FALSE |
| 621a423823ae9010632f322b6172946f | 34  | 0.849484318274827 | FALSE |
| 6b11f2c5e75502f47952b01f902ce16  | 15  | 0.852196245948932 | FALSE |
| aa806b10a642f7016ecf85fa68d73b48 | 15  | 0.852196245948932 | FALSE |
| 255e84a7816e3f4f5e5c82c5b086195d | 15  | 0.852196245948932 | FALSE |
| ba9601da497863819d4758229b591e4c | 15  | 0.852196245948932 | FALSE |
| 2c894c9e3a032a9824774aed6a96603d | 15  | 0.852196245948932 | FALSE |
| 8d9f970561fe1a7c174364c656380fe2 | 15  | 0.852196245948932 | FALSE |
| 2bab1b7d627ef1fb38400f422073d46e | 15  | 0.852196245948932 | FALSE |

|                                   |     |                   |       |
|-----------------------------------|-----|-------------------|-------|
| ccd93a6f7c86fa38459587813126e9fe  | 15  | 0.852196245948932 | FALSE |
| 15b8ef9c8fd1c209fe10fe79b57a36f4  | 15  | 0.852196245948932 | FALSE |
| 7cf993146775b44a6b8f89833e71508b  | 15  | 0.852196245948932 | FALSE |
| 8d4b1c33aee9458da55ed0181ca9b8e3  | 15  | 0.852196245948932 | FALSE |
| 882f7684e960b257722e753254c34447  | 15  | 0.852196245948932 | FALSE |
| 465a1ce875ea713594915ac415e88ab9  | 15  | 0.852196245948932 | FALSE |
| ece50a62168f85fc61385d8ad4c6494   | 15  | 0.852196245948932 | FALSE |
| 8a185c2d22cabacd694587e629c5e53   | 15  | 0.852196245948932 | FALSE |
| 6b952a73de08f9fe604db1f30be44133  | 15  | 0.852196245948932 | FALSE |
| 7227f56c77a1a528f4eaa76c94e2004d  | 15  | 0.852196245948932 | FALSE |
| 4eb188c973c9d35a8ee1c68a9adb9a42  | 15  | 0.852196245948932 | FALSE |
| a2d516468a24a0b51943203260a1e7fe  | 52  | 0.858720990665559 | FALSE |
| ca79aa0ff5c0f05327203d05dc798f8f  | 35  | 0.859260460867701 | FALSE |
| e85924823aec7bd0bf33576e477e9902  | 16  | 0.863921804725426 | FALSE |
| 0e5ef2615e277c7143361c56e09c0b6f  | 16  | 0.863921804725426 | FALSE |
| f33a119e73a383eef2ba3f02c6a134de  | 16  | 0.863921804725426 | FALSE |
| 65d47248136b94e72d9aa1fb5392b608  | 16  | 0.863921804725426 | FALSE |
| 0bf4f18b63b6282536d07bb07e9a993f  | 16  | 0.863921804725426 | FALSE |
| 82ac56ca828692be621d100e94a3d6ff  | 16  | 0.863921804725426 | FALSE |
| d0ee179b720c3f1df4b1b44f35471a75  | 16  | 0.863921804725426 | FALSE |
| a29e586ce34cb2edac8c292267d77ad2  | 16  | 0.863921804725426 | FALSE |
| b8a62348b7c542b4e7f94bf0ccb486d6  | 16  | 0.863921804725426 | FALSE |
| 5160cc9e58946a0a4337b33b6533d3d   | 16  | 0.863921804725426 | FALSE |
| 88f0846ea1250a0029afd9f77ba0e5d   | 16  | 0.863921804725426 | FALSE |
| 97d4e9ea1f067927134c5a34f0d5ad06  | 16  | 0.863921804725426 | FALSE |
| a5b07cf8520236c817752cdac1c893a9c | 16  | 0.863921804725426 | FALSE |
| 368c8aaf10922a92b5d77aa9eb36a7c0  | 36  | 0.868462790609597 | FALSE |
| a9a8ba05b0fcdabd9ee1282d3076b726  | 36  | 0.868462790609597 | FALSE |
| 28b378e38018bbf0b0484af036ef1e5d  | 54  | 0.874611180745984 | FALSE |
| c8fb6ebbb3507d5257309f12e5e4705   | 17  | 0.874739736567337 | FALSE |
| fcff23401e2280bde7682f18fa1d1cf7  | 17  | 0.874739736567337 | FALSE |
| 60cdf71a273a431942ece7f772dcb10   | 17  | 0.874739736567337 | FALSE |
| de4efdb3a52a4d915422b3bd60610041  | 17  | 0.874739736567337 | FALSE |
| 18c8488af7fada9ef923d6452aeb3a9d  | 17  | 0.874739736567337 | FALSE |
| df2dacf39bb2269336cd04a5fefdb119  | 17  | 0.874739736567337 | FALSE |
| c184aa75193f4e1f2a583a1fa827b3dc  | 17  | 0.874739736567337 | FALSE |
| 18b30b18da1d03ffe463fc69ef6441c2  | 17  | 0.874739736567337 | FALSE |
| 02e3c541b67c1f742460bbf565f63071  | 17  | 0.874739736567337 | FALSE |
| 1469f96bc2b17e99a7988e3fc891607d  | 17  | 0.874739736567337 | FALSE |
| 56b22d768a1396ed9e442d54a5ea4dbd  | 37  | 0.877119570694435 | FALSE |
| a4d01993784ebbe3fec3839448d1f52d  | 94  | 0.87993196455902  | FALSE |
| af41b8a7c03317c74926ead0fd35e8f   | 18  | 0.884718541620673 | FALSE |
| 73858fe4e97c180d5a7545ff94a6a788  | 18  | 0.884718541620673 | FALSE |
| 7fb82c9bf8a0918e18e5fd25a3064d11  | 18  | 0.884718541620673 | FALSE |
| 2d95ca79269a5201b9100b5bb7f969c5  | 18  | 0.884718541620673 | FALSE |
| c3d3ad1283cfc17a3d466847de0f585c  | 18  | 0.884718541620673 | FALSE |
| 642e62255f6c842272cd37f56c189bb6  | 18  | 0.884718541620673 | FALSE |
| e90425a6fe76084e079af542f4bd2632  | 18  | 0.884718541620673 | FALSE |
| 6f34aeafa706c2a148d34d4b640db857  | 18  | 0.884718541620673 | FALSE |
| 2895e2dc704bf22b9ac315e117faef1e  | 18  | 0.884718541620673 | FALSE |
| 06957346beaf0bdf292900cf66ebdb6   | 18  | 0.884718541620673 | FALSE |
| 073718ac989b6696918a078173a59117  | 18  | 0.884718541620673 | FALSE |
| 43d98b132b922ada4a8b34d08dff7d38  | 18  | 0.884718541620673 | FALSE |
| 2d6f7915a01751f1ab279a4e17c15b8e  | 18  | 0.884718541620673 | FALSE |
| 8ac40970733480af91b7d4204a5ee421  | 18  | 0.884718541620673 | FALSE |
| 43f2b9bb3ec86a9c4b2322f3b1ca9660  | 18  | 0.884718541620673 | FALSE |
| 24513f3439ddfcae0170dad90ebce403b | 38  | 0.885258189454661 | FALSE |
| df45ff114fca650e2150e761e33d947f  | 56  | 0.888943713616188 | FALSE |
| e7929c7247681ff65b78376206017180  | 39  | 0.892905129428559 | FALSE |
| a48c86bb43aa39dce41597a3ff0a026f  | 19  | 0.893921683255998 | FALSE |
| 794184e730540cc7ff89c9e06d29a1d3  | 19  | 0.893921683255998 | FALSE |
| fe44c3d1e39fa07e328e63b858248557  | 19  | 0.893921683255998 | FALSE |
| 6c051d317e4e22c0ed7e6a0f1d665337  | 19  | 0.893921683255998 | FALSE |
| 8603c3db2bb660bfd3b8d633a4bd4c7a  | 19  | 0.893921683255998 | FALSE |
| fdf86a1fa9f0935a6512b8d50d5997ea  | 19  | 0.893921683255998 | FALSE |
| 93708d53940a56f66653b13014c2652   | 19  | 0.893921683255998 | FALSE |
| 413bc036aa08e6c887c47488e63cfd7   | 19  | 0.893921683255998 | FALSE |
| b448d68001582a65eae812c8015a15d2  | 19  | 0.893921683255998 | FALSE |
| cff0ae11f6b5cd20ab0d14c2cb6f773c  | 19  | 0.893921683255998 | FALSE |
| a9d9e22d46fd432964b7e70ceac35fd0  | 65  | 0.894119310001397 | FALSE |
| 25089d3f7bed37ea7e764b89a1d2fe0   | 40  | 0.900085945646662 | FALSE |
| cfdd70bdf090e219bf771ede00b81bb   | 198 | 0.900672614915809 | FALSE |
| 56de38318fb195c98890d09d1fb9fd7   | 20  | 0.902407948595518 | FALSE |
| c3ecf8e6e7e7a856fbd2fd2d4ee56b56  | 20  | 0.902407948595518 | FALSE |
| 5797b86035ec7c8fa28465a07b9805f0  | 20  | 0.902407948595518 | FALSE |
| Oddcce08d53979d98bc25c7c02ae7f8   | 20  | 0.902407948595518 | FALSE |
| f64861919bd8bf28858e81c625781fc2  | 20  | 0.902407948595518 | FALSE |
| 46f6ee1a78f2fa98ad1e29c553d32636  | 20  | 0.902407948595518 | FALSE |
| 1276c14169f9d464cdb5471ea52e902d  | 20  | 0.902407948595518 | FALSE |
| ff2bd29ff42e4dc25a31714e0b6c2dca  | 41  | 0.906825251993826 | FALSE |
| 5f3673305f1d86e0ddbfa1ed980368b7  | 41  | 0.906825251993826 | FALSE |
| 4119e9aeb272d4ff8f0af3a026865785  | 59  | 0.907777302682907 | FALSE |



|                                  |     |                   |       |
|----------------------------------|-----|-------------------|-------|
| 8db9ec3c6c2da03db22d64f72b6f0c7d | 21  | 0.910231783940181 | FALSE |
| 6ac028dc5e7f0066b35194e99b072aa8 | 21  | 0.910231783940181 | FALSE |
| a1bed12a320d811c7025e11b4aa933ec | 21  | 0.910231783940181 | FALSE |
| d0e7ee826a8a40ab80d2bcc61ab571f5 | 21  | 0.910231783940181 | FALSE |
| 0a1561a33d1b52b9b8846598ed4ca557 | 21  | 0.910231783940181 | FALSE |
| 8fd632a60760954f8497f1fc8a51f4b3 | 21  | 0.910231783940181 | FALSE |
| 219122904013b99064a9d2cf96b0106d | 21  | 0.910231783940181 | FALSE |
| f48e415e85476e0bc78c07376ad7196  | 21  | 0.910231783940181 | FALSE |
| ad460170fa30ba7e8f74c918c6fbb3b9 | 21  | 0.910231783940181 | FALSE |
| eb19b3f753e323f3d3d73a77b517e46e | 21  | 0.910231783940181 | FALSE |
| ee4b74373fc0cece03796e5db2aa3d3a | 21  | 0.910231783940181 | FALSE |
| 2cab47f2bc2f1bdaefbd331f3a490414 | 21  | 0.910231783940181 | FALSE |
| 63355ac2e4dd546d908aa62e078e814b | 22  | 0.917443606794881 | FALSE |
| c324721a2dc3407ead3590c735a6779  | 22  | 0.917443606794881 | FALSE |
| af8c2f69e1dece5ad3a2f23731ae5420 | 22  | 0.917443606794881 | FALSE |
| aea976fc75991164def44c3dc183bb16 | 22  | 0.917443606794881 | FALSE |
| cd9caf8d961e5c6a16348abd971aea04 | 22  | 0.917443606794881 | FALSE |
| a5189f77a2cfeab3bc1602ff5c8ac3e9 | 492 | 0.923076923076923 | FALSE |
| 31f23810ce7087481ef862d15d9fd041 | 23  | 0.924090096078344 | FALSE |
| 3d535665aaae9491f84783ece3dd889  | 23  | 0.924090096078344 | FALSE |
| 03b3b240d243a428811ea34a257d4bd6 | 23  | 0.924090096078344 | FALSE |
| 5cda16c50b985a14e0ec9910e3726133 | 23  | 0.924090096078344 | FALSE |
| ec23b923e536e0a2279f4c973531e122 | 23  | 0.924090096078344 | FALSE |
| e952ac57af197a320c22ecec62384fc  | 23  | 0.924090096078344 | FALSE |
| 88da24edb3fb401aa506d44503445f2d | 23  | 0.924090096078344 | FALSE |
| 2d834dae498cec30f6b9043cf2910a9d | 23  | 0.924090096078344 | FALSE |
| 752353b9793ab0e9cd4dab60c7b72860 | 23  | 0.924090096078344 | FALSE |
| bb00e9f32a7ad532a6c3ed50dcb3d251 | 23  | 0.924090096078344 | FALSE |
| 1afda3ce15867b1740804995147a56d1 | 23  | 0.924090096078344 | FALSE |
| 94202d625126dcb1729abbd7d7018a9  | 23  | 0.924090096078344 | FALSE |
| cfa03a7d8244ddf2a84841f464810ed5 | 23  | 0.924090096078344 | FALSE |
| a67f1c0453dc4e295b206418d36b1f6  | 44  | 0.92462603707359  | FALSE |
| 19b699fcf40dfdeb5ed8ace52f4f2dc8 | 44  | 0.92462603707359  | FALSE |
| d1566cbf914a151f452e881fc9cae2e6 | 88  | 0.92543879210039  | FALSE |
| df72998479c8b1228c5c3943f047680b | 177 | 0.926350766924639 | FALSE |
| bba4e5e8793fe193ffacb3e7a66c9f29 | 63  | 0.928502518965154 | FALSE |
| 025f3ec3dafc2f35bc840c5669bccaff | 63  | 0.928502518965154 | FALSE |
| 15d1ae7f19a3b5bc4667544bde11d38  | 45  | 0.929826511957183 | FALSE |
| 4cf3fce832b0e75aa582596e5159e808 | 24  | 0.930214461999836 | FALSE |
| 5df57ffc227fabd2e10b3d6652ccc022 | 24  | 0.930214461999836 | FALSE |
| 1c6fdc27b561532077e6d9e80823a7fa | 24  | 0.930214461999836 | FALSE |
| e1b3da5566b52686c72b1c8b37d79ab9 | 24  | 0.930214461999836 | FALSE |
| 3db627cc5e513aef2a1a4690e49e095f | 24  | 0.930214461999836 | FALSE |
| 54f785fd2739fa4cdf5fac6da3ebfe4b | 24  | 0.930214461999836 | FALSE |
| 22be50f25335287f88a3b9c75961865b | 24  | 0.930214461999836 | FALSE |
| 1c0b93dba78bead886310532c780520c | 24  | 0.930214461999836 | FALSE |
| 4bf24b715c00092ece6c83803f8f0fc  | 24  | 0.930214461999836 | FALSE |
| bc880c65f6166950172bc6317df770e3 | 24  | 0.930214461999836 | FALSE |
| c652553c5dcf87deed14605ad770aef4 | 24  | 0.930214461999836 | FALSE |
| deba196a20f64e12587b394043745e35 | 24  | 0.930214461999836 | FALSE |
| 70f27b663b51acdefb4c6e059612bcc5 | 24  | 0.930214461999836 | FALSE |
| f248f33104991f8f21e7cd8053710b68 | 73  | 0.930864893815069 | FALSE |
| 28bd824140d5c67d97ab2272d1014303 | 74  | 0.934524190979015 | FALSE |
| 0e22b2e49a15e74e09bf1c151ed0f16a | 46  | 0.934694395790298 | FALSE |
| f8becf0c50c828245f68b0f69562ad0b | 25  | 0.935856696987084 | FALSE |
| e3e402965331906831146281f74a361c | 25  | 0.935856696987084 | FALSE |
| 96716aeeb18233697ce5131e6a0e778a | 25  | 0.935856696987084 | FALSE |
| 077e11092881c0e616329dbdb02051ea | 25  | 0.935856696987084 | FALSE |
| 76ecf45f639b721f6645c142b2591b9  | 47  | 0.939248703899328 | FALSE |
| 5ee5bf5ebc1547aea9d338e88b0b7c3b | 47  | 0.939248703899328 | FALSE |
| 642567877ebcb1fc9c9b26a7ea85fbc3 | 26  | 0.941053808958279 | FALSE |
| 7acfbffd36ba9fa46063bf2688c97afa | 26  | 0.941053808958279 | FALSE |
| bae9e2ba2c9f33c59e2c4d6127de0a3a | 26  | 0.941053808958279 | FALSE |
| e48e37a0467ce3d2ff2c3a0f1167497b | 26  | 0.941053808958279 | FALSE |
| 2c22a0fda496e652c971a6cfc88ec26  | 26  | 0.941053808958279 | FALSE |
| 8b1f185c948b07011f747c2da9878f91 | 125 | 0.945011945405258 | FALSE |
| 75d434e8cbac96a34057771b55101151 | 27  | 0.945840038145428 | FALSE |
| 16458c9597c20507281592a80ecdc7c5 | 27  | 0.945840038145428 | FALSE |
| b3bd84d7babbb68dbd7a1528593265c4 | 27  | 0.945840038145428 | FALSE |
| 70f04406961b7b38ab74ba06cac3c090 | 27  | 0.945840038145428 | FALSE |
| 933bef6fc914f6f30ce2edd6cb048102 | 27  | 0.945840038145428 | FALSE |
| d4dc3f83e8ada91f63124bd347103ae9 | 28  | 0.950247058596121 | FALSE |
| 5a4eda6fcd6ab834dba0111f5e5d95   | 28  | 0.950247058596121 | FALSE |
| 1a5c35a922fd259929f1379e9fc89fe9 | 28  | 0.950247058596121 | FALSE |
| 61324ada608d3a8fc4f97057a7acd186 | 28  | 0.950247058596121 | FALSE |
| 4bb0efcbe14db9a98578c065540b3ce0 | 28  | 0.950247058596121 | FALSE |
| d453b2abebc22f909d8e87353f4d03ad | 28  | 0.950247058596121 | FALSE |
| c33766d386623db8e71db4e9d44a2f8b | 28  | 0.950247058596121 | FALSE |
| a1b5c85117491a6fee703b82718600c6 | 28  | 0.950247058596121 | FALSE |
| 6cd8021d0df25c00c8f825e988b87b40 | 79  | 0.950296797263479 | FALSE |
| 6091b6f3a98a65dea5b6add6b3b7d887 | 50  | 0.951207180480497 | FALSE |
| a73619885909abe32871924ea5d5573d | 50  | 0.951207180480497 | FALSE |

|                                  |     |                   |       |
|----------------------------------|-----|-------------------|-------|
| 8e7e470f27ee9dee24fe1063312db221 | 50  | 0.951207180480497 | FALSE |
| 70aa5a01ed7683fd122c10659d43706b | 80  | 0.952997495063912 | FALSE |
| 1a95e5b78913fedee75e1f052399e016 | 80  | 0.952997495063912 | FALSE |
| 9ba80d636e5561c9a76f1aa0f67b5b4f | 128 | 0.953018111878516 | FALSE |
| dab9247c26155029ce7821e765ebc155 | 29  | 0.954304165405879 | FALSE |
| 89c4dd7f04661867c45fbc395b3fcee  | 29  | 0.954304165405879 | FALSE |
| 480a9d52f57963fd090a9d94ee44681  | 51  | 0.954679968359587 | FALSE |
| 07bf7669e42ebc17a676ae314133677b | 114 | 0.956449115914962 | FALSE |
| c7985a28aa4cf9627133974bee02eb07 | 30  | 0.958038448663033 | FALSE |
| c4bffd0ab73cc7a0273cee68fc49e24  | 30  | 0.958038448663033 | FALSE |
| e27680d4009f98f30248d823bc17fb8e | 481 | 0.958468877945874 | FALSE |
| e71f2cd748d4be5bf9412164728834c2 | 65  | 0.95978801932764  | FALSE |
| 8d278be881c77f270f9250ee0f55ff8a | 437 | 0.960667235356931 | FALSE |
| 8ba130bd59fb89ff9f115561c5945f96 | 53  | 0.960945634967021 | FALSE |
| c88aa34a8ddb9b4f44cd46b7ca1ebdd4 | 31  | 0.961474955022526 | FALSE |
| a2d411fff3a418ad531287e0f24eb090 | 31  | 0.961474955022526 | FALSE |
| fbdd0ce9feb0e5bc7494354ad9296b92 | 31  | 0.961474955022526 | FALSE |
| d684d6466b2c6e9ac91ecc13f105b1c4 | 31  | 0.961474955022526 | FALSE |
| c0a5a04e7e5773e91892d4c41ab7e0cb | 84  | 0.962505104355992 | FALSE |
| 2d983b4684cc85598f7454c72b58eb26 | 54  | 0.963765892214911 | FALSE |
| 9a2dc4f076b397af87aa6a5cf4404d41 | 133 | 0.96413379708232  | FALSE |
| c5803199ff4c3da81551b3b5223ec5e7 | 67  | 0.964214349147749 | FALSE |
| b519b2fa0b4b23dbc16576634c819d16 | 67  | 0.964214349147749 | FALSE |
| 9bee9198d6fd38b817cf2f3a7b118763 | 67  | 0.964214349147749 | FALSE |
| 23951d86554a06257abfffe1b4bcd8f  | 85  | 0.964587351118251 | FALSE |
| ac181dd33b4fc009cce071af5f0d21c0 | 32  | 0.964636837763658 | FALSE |
| e9fac19935b286ddf2a78075e7017977 | 32  | 0.964636837763658 | FALSE |
| 3d8c220d0ff87025f87b4955bce98e2b | 55  | 0.966394818614568 | FALSE |
| 664ba36a3ef364511b4b5865f662ea58 | 33  | 0.967545496129418 | FALSE |
| 40569c7ad9644afd194ce2f0c317d157 | 33  | 0.967545496129418 | FALSE |
| 38c2834f2d440309fa6dd0bdce32ed78 | 33  | 0.967545496129418 | FALSE |
| b05bfc2ed94261623c92866941caae4  | 33  | 0.967545496129418 | FALSE |
| 8c29c0ac4bed029ebbeb22b3935cc8bb | 69  | 0.968175996315455 | FALSE |
| b28ed22c1484414affbb2110e2cb8dd0 | 70  | 0.969997389487643 | FALSE |
| 73df01709999f4490d3dcd729cb9665f | 88  | 0.970211815168778 | FALSE |
| 502d89eeb4d74d570458302627aa1beb | 88  | 0.970211815168778 | FALSE |
| 19b611714457a10b79396b8ee7dfbba5 | 34  | 0.970220704691418 | FALSE |
| 34e6dd3019805dcef9989972c300b776 | 34  | 0.970220704691418 | FALSE |
| 6a316c83cc725ab296f381e1977fcc84 | 34  | 0.970220704691418 | FALSE |
| e8760ab74d8bf916e7b9e6742d3fb1fd | 34  | 0.970220704691418 | FALSE |
| 840600f831582858ed2ae3964571e4e7 | 34  | 0.970220704691418 | FALSE |
| 05a9bdb05e34d5848bf5144f0e58419b | 380 | 0.971009992641975 | FALSE |
| 57d52f46acd5562d4edee17e354f9cc6 | 57  | 0.971125753566493 | FALSE |
| d3247c936f8f4735909a8526ebf2f49e | 391 | 0.971435119747249 | FALSE |
| ae4ab154cb983f0fccdc437f469417cd | 35  | 0.972680733434301 | FALSE |
| b2bffa9e2ea7dfdeb3807096c69b1e9a | 35  | 0.972680733434301 | FALSE |
| fd1c43ccf4c93ee1cd46c142e1485689 | 35  | 0.972680733434301 | FALSE |
| 8c623c0f9544735a038e1d30d2b51fa2 | 35  | 0.972680733434301 | FALSE |
| d4f532a400b5a2e27e030558ec7e3a10 | 35  | 0.972680733434301 | FALSE |
| ace63ae9de78bed2e5510a38c85812f1 | 35  | 0.972680733434301 | FALSE |
| 4c06188bc9c7b91eec9e1fe25da00706 | 312 | 0.972895070666662 | FALSE |
| fc94161516cf5edaeb8c984c59c9ab21 | 73  | 0.974888026979453 | FALSE |
| 7ce80a763e15761f1fe86ef8581f826a | 36  | 0.974942459206624 | FALSE |
| a347935cc17b25761d608e0a04fa70ef | 91  | 0.975001953706185 | FALSE |
| ca461f4b5e8bd616a405daf92ae0f20  | 59  | 0.975226221953206 | FALSE |
| d6be45afca6371cdd7d012d8ce94ebd8 | 108 | 0.97523648938085  | FALSE |
| ba673c958da8e9385196463c6ef87a4a | 140 | 0.97582220885328  | FALSE |
| fa5757ea2e0bd2ada15a5592ae37c723 | 37  | 0.977021469141446 | FALSE |
| 51700328b249bef1561f6d7115121c77 | 37  | 0.977021469141446 | FALSE |
| 52f7717d7d4b29e0a22c4e08ed966ea3 | 37  | 0.977021469141446 | FALSE |
| 48cd0867fbc39c565a7343262fa9585e | 37  | 0.977021469141446 | FALSE |
| e3aa1e69ab25c04321fca9f0996fb994 | 37  | 0.977021469141446 | FALSE |
| 446d2c96ce6aaa50144d2da771ef8863 | 37  | 0.977021469141446 | FALSE |
| e8e69f28dc2939bc04a1690ab27bd4bc | 75  | 0.977718738157169 | FALSE |
| 9dfd78e79bba89ffe82035671fd61f9d | 61  | 0.97877442548296  | FALSE |
| 60de5a18f62043a523b08ecc4e10a441 | 61  | 0.97877442548296  | FALSE |
| 0fb527bad6c2916e89a972cf6eaf8a42 | 279 | 0.978835312501384 | FALSE |
| 48957f322815bd853ff040b697d46043 | 38  | 0.978932156608897 | FALSE |
| 1320f4cb4f2f04a8f6c7709b994b937b | 38  | 0.978932156608897 | FALSE |
| ad65b63c122ba12caca483840f34ddf  | 38  | 0.978932156608897 | FALSE |
| 28323331d787c7344fc7407d7e26effc | 38  | 0.978932156608897 | FALSE |
| 8134209f8d6001f476f316447084e099 | 77  | 0.980246285334548 | FALSE |
| f9ff9d5eb1c59d26a9689d1b617eba2b | 62  | 0.980363455186265 | FALSE |
| 66e6cf9c166194e84fdcf94637ce3bfe | 39  | 0.980687810224822 | FALSE |
| 897b61e5d2dce1bf89fedb73ed0eca90 | 39  | 0.980687810224822 | FALSE |
| 45a68a9eee3c83e27f4ea309d57ffc3  | 39  | 0.980687810224822 | FALSE |
| 3b150d94f8782944249fd0a73999227e | 39  | 0.980687810224822 | FALSE |
| 5a8154c58ba9ea7bdadbccf21b3a3e6a | 144 | 0.980868578285112 | FALSE |
| 8d16916dcdaa69cee304e39539b62bec | 40  | 0.982300696403848 | FALSE |
| ae6ea074d9cd8ec6896004a16d81702b | 40  | 0.982300696403848 | FALSE |
| 0345b451b2a01dbc32e694d5310d02aa | 97  | 0.982522440946451 | FALSE |
| 501dd344beeb7c69607fa1ffd9cfdff  | 41  | 0.983782135911896 | FALSE |

|                                   |     |                   |       |
|-----------------------------------|-----|-------------------|-------|
| d70bd64edc0672b74dee70fad8437752  | 81  | 0.984512697502304 | FALSE |
| c224c0288f2ed4a3bc220986cad1932   | 42  | 0.985142574842024 | FALSE |
| 6d43cac09b0feb5f95abf46b0080739   | 149 | 0.985852356254384 | FALSE |
| 5f7b1039e8789ade0b68ff96715ebdc1  | 43  | 0.986391650408402 | FALSE |
| 8cbc77e3bd6a3cadc92289ed7497eb49  | 43  | 0.986391650408402 | FALSE |
| 7020e0243ea7e1d11d3eb43591f550f   | 43  | 0.986391650408402 | FALSE |
| 15b888fac2a8be4df2917b6670dad73f  | 235 | 0.986912054992386 | FALSE |
| 53dc126c6dcdbed4cdd3e2bc29bcb2f5  | 84  | 0.98712561921398  | FALSE |
| 4cd36df6046c25842ef887d47e7b023   | 44  | 0.987538251926098 | FALSE |
| 67acdf1a08a501e960ccc83a5c62c9    | 44  | 0.987538251926098 | FALSE |
| b08ef9b722e924b7d7758709ea999bac  | 85  | 0.987900140202004 | FALSE |
| 2e94d4dfa19d87774d333b853caff60   | 66  | 0.988438983428952 | FALSE |
| 0339d50219c71731139f9ce51ded15c6  | 66  | 0.988438983428952 | FALSE |
| 3ac305e8c1b4c9ea90f35d8600f8b8d6  | 45  | 0.988590577319005 | FALSE |
| 830c3ea3526c42f09986097a09800338  | 104 | 0.988632991898301 | FALSE |
| 1e8a8c7842c164cb6f6c6029625e902c  | 67  | 0.989132559179371 | FALSE |
| f924b59e41bdb872246acf7db5361fc2  | 67  | 0.989132559179371 | FALSE |
| d3640519d63b009a839d93bb86a6bb29  | 87  | 0.98931962583368  | FALSE |
| 6b72125ff5c3d74a2394b56bb6ea404   | 105 | 0.989322858710674 | FALSE |
| 8643001f205ade41838a964499d97b8   | 169 | 0.989648763831626 | FALSE |
| e2f82f601e2f4d6f8cc9001faa84d7e2  | 88  | 0.989969187801586 | FALSE |
| bd23f3464dbee38f2352549d726766d1  | 88  | 0.989969187801586 | FALSE |
| fb9868c77db10fc39a0129cde8a6d9b7  | 88  | 0.989969187801586 | FALSE |
| 52433c56fb7fbc1f94822c886b18b92f  | 69  | 0.990402291856229 | FALSE |
| 8dddef875ae1fd71b2f55cee552f56e9  | 47  | 0.990442044742412 | FALSE |
| d2b22a6509e29fd8d160f8af18373fb7  | 47  | 0.990442044742412 | FALSE |
| b86810a3acc42fe737e424e186df83f3  | 47  | 0.990442044742412 | FALSE |
| f3b9cecc06cf0c99e801d491b67de2cc  | 89  | 0.990581499379893 | FALSE |
| 60efc1e5aaedaa4974a098acf1a85a2b  | 124 | 0.990649125722333 | FALSE |
| 8f98fb8693ed59c21399d83ce2d10724  | 156 | 0.990888861088775 | FALSE |
| 62bcf76a05df8d7152251dc1abacc559  | 70  | 0.990982774941752 | FALSE |
| a54623313df876441f6bd6ea2292102   | 48  | 0.991254577851558 | FALSE |
| 4fb4479ec3e40df5abc4b828e8a43e85  | 48  | 0.991254577851558 | FALSE |
| dd8f8921af5ba9b0e334e9b08aaf18    | 48  | 0.991254577851558 | FALSE |
| 8af0ba30611d668e5a3927f85542f627  | 109 | 0.991712936225779 | FALSE |
| a86b3fc71972a1363443bf2934eff4c   | 109 | 0.991712936225779 | FALSE |
| 55af53a70bb5d746e81b9ce3713a110f  | 49  | 0.991999703505461 | FALSE |
| 2448d5a801ab0985c09a7c265d15308d  | 49  | 0.991999703505461 | FALSE |
| e27762562e5f097f5dd5d3ddaade6200  | 110 | 0.99222751881737  | FALSE |
| 5d564d4db4dbb67c61b7fd7fbffe15d3  | 127 | 0.992284862432369 | FALSE |
| 1ff5d9c73c320602c29d8f6f67907114  | 73  | 0.992530200713038 | FALSE |
| 4ade57e5bf1dea163c998a806258ee84  | 50  | 0.992682874891512 | FALSE |
| b4204990d266b67c13e644d5e2e3be91  | 50  | 0.992682874891512 | FALSE |
| dd4411cbe45e5040a3a75c1c10cfa747  | 74  | 0.992987246573161 | FALSE |
| c991e7b4a3dee5ea8515b854f6631824  | 74  | 0.992987246573161 | FALSE |
| 9e821a0ea32dc0a79c624893fa1742aa  | 145 | 0.993189977710979 | FALSE |
| b121a17a2f7b359de8888212613f319c  | 129 | 0.993225110763305 | FALSE |
| a75fdbd0512a2e0b09b67946674ea28e  | 51  | 0.993309115328724 | FALSE |
| 3ff22a19150bb5bb3fac504b21dd1e34  | 51  | 0.993309115328724 | FALSE |
| 1860bcc07a862435fe3fc78797201dad  | 51  | 0.993309115328724 | FALSE |
| 573610ba002103484c779191832a6c9f  | 76  | 0.99382283300343  | FALSE |
| 51e441cbdcc80da0656e82293ae160b5  | 52  | 0.993883051259895 | FALSE |
| 96a4b5621edd6a80e9bd93ec87b70e47  | 96  | 0.993981542524009 | FALSE |
| e7610857aa92ccaca28d9abdee16c246  | 53  | 0.994408942780537 | FALSE |
| 2987f11421aba677b3ed1ba21faf8907  | 53  | 0.994408942780537 | FALSE |
| b63b4aff4d8c479995ebbb5c206efcc5  | 53  | 0.994408942780537 | FALSE |
| c45aec1dff493b3b3a92b769c3527575  | 53  | 0.994408942780537 | FALSE |
| e5698bb0af657f3e43e3cfbee8f55c7   | 53  | 0.994408942780537 | FALSE |
| 731043e4dbf3a367cdaae8b91bddbfe   | 55  | 0.995331968584332 | FALSE |
| 47eac9c2676422e360170281752eba7   | 55  | 0.995331968584332 | FALSE |
| f033e2deaafb6fd1525fc91a4d76a8b1f | 100 | 0.995366986351095 | FALSE |
| 5a722836ab0e0124d64413717949ade4  | 81  | 0.995518134373802 | FALSE |
| 686b1c1752a35be01421dfdacfa244e1  | 101 | 0.995663257771153 | FALSE |
| b1164c7556428ca28a0fa47436b70504  | 56  | 0.995736035085005 | FALSE |
| d5a1283783f4f7170bdef0cd036ee48f  | 56  | 0.995736035085005 | FALSE |
| ff7520f4d531ff12bb529c5403dbce5f  | 82  | 0.995799422473728 | FALSE |
| 9ad50086ebb6725181556774a235e206  | 102 | 0.995941708331355 | FALSE |
| 74f929cfd22b1eae037d866281cfc63   | 83  | 0.996063945953789 | FALSE |
| 118ec7a179026c54887b0f117b8270b8  | 83  | 0.996063945953789 | FALSE |
| a9b2c08281a57e2decf34d0892ba7947  | 83  | 0.996063945953789 | FALSE |
| a3d81bc3894304b7c0a6df55297a8d08  | 57  | 0.99610596811416  | FALSE |
| 37ffc50b19370c0b659f4c3d919f99e8  | 57  | 0.99610596811416  | FALSE |
| 9dfda2206e7dccc1438c2594ff36f4b94 | 57  | 0.99610596811416  | FALSE |
| 96bf4520c8e056750f57133a13ed76dd  | 57  | 0.99610596811416  | FALSE |
| cacfa81f2bc89116d93fe225248244da  | 85  | 0.996546457471862 | FALSE |
| 5aa73bdfc0eca9a7c83f64620d8828f4  | 59  | 0.996754455673928 | FALSE |
| 4f27892b2ff94c7f0d0cf982f27d8541  | 86  | 0.996766197016136 | FALSE |
| 56fd8c08e9e106325cabe0a193e11914  | 106 | 0.996896639309482 | FALSE |
| 58238c3d1af33f7a1e7c6769b3870a66  | 60  | 0.997037974488619 | FALSE |
| a1c5c150d75a73a1e90ce9724214d0e3  | 61  | 0.997297322344454 | FALSE |
| 35e06063493e115e43f15cc0d438eab2  | 61  | 0.997297322344454 | FALSE |
| 53805a3bc578a4a6d9b8dcb1946e6d76  | 89  | 0.997348877863528 | FALSE |

|                                   |     |                   |       |
|-----------------------------------|-----|-------------------|-------|
| 1643fdafc7ede484acb8d727168ab741  | 189 | 0.997385663338198 | FALSE |
| e6fc000a27af86cd26973287af4e061c  | 109 | 0.997469994209178 | FALSE |
| 5276610a51db67a6a227a6a3b486efd0  | 90  | 0.997519988992907 | FALSE |
| 374a0952cc1222bfe7e3f87423eb96a9  | 62  | 0.997534508836165 | FALSE |
| 8b4400776aa5b6f0268025915d1bee5a  | 62  | 0.997534508836165 | FALSE |
| f4ff94f14b1feb5a48cc311c5c895ea0  | 62  | 0.997534508836165 | FALSE |
| a8350956db53b9cb8e376f9406f154e3  | 218 | 0.997537442777406 | FALSE |
| 9ee696aaabfe93f028faf08377028b06  | 110 | 0.997637937380995 | FALSE |
| 54e7b2139640ec28fbaf7f0491cad845  | 91  | 0.99768064271719  | FALSE |
| a26ea2de067690b7f7ed5e1d1efa4770  | 63  | 0.997751380744095 | FALSE |
| cb31828b8f23e5e0d3bec4436df5444c  | 111 | 0.997795403298972 | FALSE |
| 5323c6dd766d629cc750b0aab4aaf72   | 92  | 0.997831444998761 | FALSE |
| a3b72b215a67e3caf3e3db37446195a4  | 64  | 0.997949634878026 | FALSE |
| 138a326ebca05adbe3f688c7b3ae46b6  | 64  | 0.997949634878026 | FALSE |
| 09a077421a0f673d4a4ef0a0e3f7a913  | 64  | 0.997949634878026 | FALSE |
| 54f3fa8080e96ee8c48b77627ac0ae3a  | 114 | 0.998210893905748 | FALSE |
| d77a3cc416991d5d3767214641e5b2ca  | 95  | 0.99823031082286  | FALSE |
| 2a5837baf8baa50071f3e36a0ff46fe2  | 236 | 0.99827897279397  | FALSE |
| 0a4009eb300a0f2671383587d6d8401e  | 115 | 0.998332246750527 | FALSE |
| 1815dac9ba55db9afc80283229a98eb4  | 115 | 0.998332246750527 | FALSE |
| dbfde3e3bdbc75dd679758dad4834b73  | 115 | 0.998332246750527 | FALSE |
| 05b920e10cddf14fb5b0f0b42237d3e3  | 96  | 0.998347123119959 | FALSE |
| 57c580b06ef43b527dce14437166ba0b  | 136 | 0.99869184496278  | FALSE |
| d226235298c561b8478e3e446da337    | 100 | 0.998745655854517 | FALSE |
| e9e8170bb8209aa94f8ec9a4718ffe6e  | 138 | 0.998870720871609 | FALSE |
| 698b4f5204ec0b08253a421ffd6bf57f  | 102 | 0.998909146884648 | FALSE |
| fc7d25194c7a7e800b5f7063a557582   | 102 | 0.998909146884648 | FALSE |
| e3beabd067252bb387cfe12787744633  | 121 | 0.998913223732208 | FALSE |
| bd2d39a2564b0ecc2f4e153d55d8fb7f  | 121 | 0.998913223732208 | FALSE |
| 4ad750cce3d83d64cabb192681982484  | 156 | 0.998990942515244 | FALSE |
| 366511529e7fcd4e72ba41ced9049d7b  | 140 | 0.999026645773671 | FALSE |
| bec577c7cb4088fbb5631dc6ca656132  | 124 | 0.999126678027944 | FALSE |
| 76e476e3f5080af8597b9ea02dea6b0e  | 160 | 0.999258361933329 | FALSE |
| 5ebafbc67cbf3c6e47caca9b43ce08ef  | 108 | 0.999287599053711 | FALSE |
| b5a4fee1a67d3818a8b8e8fbc9e19424  | 109 | 0.999337145076013 | FALSE |
| e7ea4dc0277b1a7a2abe593bdc1d0ead  | 110 | 0.999383439652355 | FALSE |
| c17057f15de467ed9c2c7a57817aa221  | 112 | 0.999467066146307 | FALSE |
| 9d63796fb581267f616c12eeaf801ec2  | 115 | 0.999572774925443 | FALSE |
| 2068bc70de0f52d80b3aeaa003321213  | 151 | 0.999582373188258 | FALSE |
| 4ddd7df6ea0439b9b350e9795d3df725  | 134 | 0.999588342208228 | FALSE |
| eb71a8778089c7404c228b317e38fef5  | 116 | 0.999603391690688 | FALSE |
| ea587b40e7bc6e3eadc37e63ec3ac249e | 152 | 0.999614271499125 | FALSE |
| 7e2ee3da1211add21aedb397c0807d7   | 184 | 0.999626238308179 | FALSE |
| b2ea94f362ee35da22832eb8c68eb9dd  | 118 | 0.99965854857485  | FALSE |
| acacdad0c65e14937a0c7dbc6cb5f43c3 | 137 | 0.999673892453825 | FALSE |
| c395ce96ac93ca3a6c81d07dbf85a94f  | 255 | 0.999684196681777 | FALSE |
| e6ba559878b76dfc9c3c35aad453efb6  | 157 | 0.999742452486147 | FALSE |
| e12ab73726e1064cf0896d411a38c0d4  | 140 | 0.999742581542467 | FALSE |
| 00ca181e6e6aba8dc69ca15436732300  | 140 | 0.999742581542467 | FALSE |
| d9749f8b3a9efd705cf66b9e6c2a8e6f  | 140 | 0.999742581542467 | FALSE |
| db8252bed6b71c5e2c7242fe02ce5b1   | 122 | 0.999747971981451 | FALSE |
| cda4e6f933bb3108ea3e92f9db411c00  | 479 | 0.999771789839331 | FALSE |
| bae67a3f8b760d01ac5d851c35de517e  | 142 | 0.999780578992592 | FALSE |
| b36b52b10a3708b8e5fbaac814ab0931  | 272 | 0.999798373786883 | FALSE |
| 947a3c66fd46a8560854dd1c0dade2f3  | 126 | 0.999815044263348 | FALSE |
| 5343298f6ab7d59eb55c114cfec8b1ab  | 126 | 0.999815044263348 | FALSE |
| 5b4f8b625d8fbb1268863be7dbc4db5d  | 161 | 0.999815098254206 | FALSE |
| 3b555d2d7a26e295dbddc64f10220157  | 147 | 0.999853885653837 | FALSE |
| fe2f04ee87e40784f5104a15bec2058f  | 164 | 0.999856504232813 | FALSE |
| 60f2c9280ca556fd607cc51bedb8b6    | 148 | 0.99986547084978  | FALSE |
| da77cbea962a956691c9df99fc91ccc   | 131 | 0.999875427733902 | FALSE |
| 61abd8a8fc64fc4ea6aa6bb33c056efd  | 166 | 0.999879113464545 | FALSE |
| 3cbaa88b2064dc5314799d201534ec7   | 133 | 0.999893933187167 | FALSE |
| fa60ad5919ebdc9b39b18872718a2393  | 290 | 0.99989482601865  | FALSE |
| 0d36c8f594b37214b4b58f29e1721f83  | 412 | 0.999899452336954 | FALSE |
| c0e8688a1ac2878e2e6f62fe2a9304a0  | 134 | 0.999902186582871 | FALSE |
| 114a25e4cdc99c47c718434af3821ad4  | 135 | 0.999909834237843 | FALSE |
| e59dec1a8a7c223eec18dbac3621bfcd  | 154 | 0.999918812324862 | FALSE |
| a74d576891e4a308b4e08ab2a713bf5b  | 216 | 0.999922674573975 | FALSE |
| 7945babbb9c10211ec6dc054af97441a7 | 190 | 0.999942767697508 | FALSE |
| 448df6a475edcccc5b389fe189f85fd5  | 147 | 0.999967158466949 | FALSE |
| 10036e06b250b7624c5b886014e3b2ec  | 147 | 0.999967158466949 | FALSE |
| 608e6548b1b4cbb6176c8fce090991a5  | 440 | 0.999969856753885 | FALSE |
| b078843bd82f039e57f68ab3a5a39c1   | 265 | 0.99997139406525  | FALSE |
| 75dfd64719ae4652eac85de6f5bfe498  | 198 | 0.999973467632021 | FALSE |
| eb01a38d86dcf9d0cc9d44abaa152f4   | 213 | 0.999974597960593 | FALSE |
| 9cc12e6a4537bd55623ad90bf6b7084c  | 254 | 0.999976179830259 | FALSE |
| ef606438f599842862bffdb564c7148d  | 154 | 0.99998231804312  | FALSE |
| 02bab2db0a7782cf48dec72cbac4bb20  | 172 | 0.999983924849906 | FALSE |
| 67a8bfa400cf64467ae73d78ee9b825c  | 188 | 0.999984067773002 | FALSE |
| dfc9a1ff9b06e08d2132da15e61b3919  | 306 | 0.999985833424557 | FALSE |
| Ocfd5d23461f5a71d9628ac22ce590ac  | 295 | 0.99998649106477  | FALSE |

|                                   |     |                   |         |
|-----------------------------------|-----|-------------------|---------|
| 5285ebad4f31b3e14f431007008acc63  | 235 | 0.999989412777277 | FALSE   |
| 87cae47f30ea5a277a184645acc3b29   | 160 | 0.999989795870326 | FALSE   |
| d64d3900ff68de4ea004f18ba50c364   | 239 | 0.999993294835884 | FALSE   |
| a9a88c76960dfd5173b31ab28fe6828b  | 267 | 0.999995006944357 | FALSE   |
| 29353ed4af9cbabb15cc3cc85a1f760a  | 215 | 0.999995510222954 | FALSE   |
| 4c60dd7ba506649272fa67651b05a2f7  | 170 | 0.999996086406941 | FALSE   |
| b756bd4eff15dc5da0d88f9c34f65398  | 293 | 0.99999629171413  | FALSE   |
| d322746e6effddfd841ee35b5ba8ea1f  | 245 | 0.999996712798885 | FALSE   |
| ae8c85dff97d56450e41e66c152ce85   | 271 | 0.999997027002998 | FALSE   |
| 883d7985f03c15e9a5868bf9e14107d0  | 174 | 0.999997374135758 | FALSE   |
| babe77fccd08d91c140f37209e4bb5a5  | 220 | 0.999997444468929 | FALSE   |
| 98679ce00beb048dfa099128eef70f21  | 175 | 0.99999762694986  | FALSE   |
| ad6f1612a5a7fdb80cf80a0402d48ee1  | 211 | 0.999998612465422 | FALSE   |
| b125cd368e6d851a7650f0a58795f5eb  | 181 | 0.99999872372356  | FALSE   |
| 7ca9c8834010100a0dd569f0b2b5666b  | 213 | 0.999998898059349 | FALSE   |
| 4cecd2478253cedd0dff65d35d7c434a  | 290 | 0.999998904915158 | FALSE   |
| a78fa572a60226d8150bf0cf0fad652   | 241 | 0.999998942214219 | FALSE   |
| 0a93c58cbaf5e764041cab0ad3e79b08  | 258 | 0.999999380746795 | FALSE   |
| 50b47d356c39644171792954d17fce0b  | 188 | 0.999999398765722 | FALSE   |
| 14fb9695d2e95bd663ad9a51b4d06723  | 276 | 0.999999726560132 | FALSE   |
| b78823261d78f2495896a69a3949e005  | 310 | 0.999999728244397 | FALSE   |
| 773727ee7de31552dcf3f9609c18bdad  | 211 | 0.99999975236723  | FALSE   |
| 28c1c628392df6a901829cfd2359a460  | 278 | 0.999999797358187 | FALSE   |
| f3a9e69bd296dd5d39ffec544b36f25   | 398 | 0.99999988284644  | FALSE   |
| 669fa3f5bd7330211bc2d8d996a9e3e   | 220 | 0.999999919550495 | FALSE   |
| f5ef8bcbeee4753d8edc0b1d7e0aa499  | 206 | 0.999999926051858 | FALSE   |
| 2081e8a45b69df88f6b3a5c914871247  | 240 | 0.999999965205849 | FALSE   |
| fb6931fb710455a0e1c19b26af270255  | 227 | 0.999999968102121 | FALSE   |
| 5be8258fc43191236125bcc62765fdd9  | 293 | 0.999999982309437 | FALSE   |
| 8cb3f4e315069c9334d1c069b96e3eac  | 234 | 0.999999987948591 | FALSE   |
| b8ba8f7a8bade720e87ca59fc4ab7fdb  | 274 | 0.999999991073874 | FALSE   |
| 267d0f9a598522aa3ee4069277ea81bb  | 250 | 0.999999991988983 | FALSE   |
| 6ace15b44dc69780c4bf45ef07ca096d  | 241 | 0.999999995678932 | FALSE   |
| b704e320a56fc1af1835929a3b71b7e3  | 255 | 0.999999996325366 | FALSE   |
| 8114b1d0274e9e4bb6c91f6af1b8fac8  | 302 | 0.999999996590613 | FALSE   |
| 3568d370fba8e070545cb84b03b7a088  | 268 | 0.999999996698289 | FALSE   |
| a2daf95d820d43e97bb2f8f61e3baaff  | 280 | 0.999999996796675 | FALSE   |
| de2a368a837144ad6e7b6f4c176b742f  | 272 | 0.999999998303345 | FALSE   |
| fd75fae7f9721be5ba0e4a3704a1dedf  | 307 | 0.999999998724608 | FALSE   |
| ef54ef898867d22d2f65ebda83483ba1  | 331 | 0.999999999438227 | FALSE   |
| 74299b737604267727262b92dde7d1131 | 322 | 0.999999999534007 | FALSE   |
| 2eaaaf1e130174d468d3b94c4f900e6e  | 281 | 0.999999999671667 | FALSE   |
| e7142feb387f929ee101779e66677cb9  | 297 | 0.999999999874447 | FALSE   |
| a2613697e6d6cc02bc530fd192f06bc9  | 311 | 0.999999999940768 | FALSE   |
| 2f93e58b78f2842e83abd5fde37ad276  | 421 | 0.999999999980276 | FALSE   |
| 2545c00c4b7992fda321d40d92a8cab4  | 336 | 0.999999999984447 | FALSE   |
| e083e2f58987c5f8db5d4dd16ddde91f  | 364 | 0.999999999990278 | FALSE   |
| 5160485a724e51fcd3e4ebe658012aa8  | 416 | 0.999999999990541 | FALSE   |
| 9e1d3dc63682fe2097c4dfa8dec76e9b  | 344 | 0.999999999999885 | FALSE   |
| 24a60c6448e70d9198ad6ba93520958c  | 477 | 0.999999999999994 | FALSE   |
| 28b8399c2b0790f21a60a17d495c620a  | 386 | 0.999999999999998 | FALSE   |
| 520c77820886daeb8cf0d6497cfb1344  | 311 | 0.999999999999998 | FALSE   |
| 5aa8281fbf9be4bfbf7ac852f1bdf8fe  | 373 | 0.999999999999999 | FALSE   |
| 77acce47fd181b78f7e66aad08abe01   | 439 |                   | 1 FALSE |
| 5f92443932d0deb4cf0d196b6e4fe4c0  | 396 |                   | 1 FALSE |
| 3f0d06b8c1b5e61b424af5b55ee3496d  | 411 |                   | 1 FALSE |
| e92e9e21eab765c6ada40b76b7df1e0c  | 417 |                   | 1 FALSE |
| 523ac9f41cf23bf8c67d6537760b28d5  | 361 |                   | 1 FALSE |
| 49fc1baff761bf9d357844d43cd138ed  | 1   | NA                | FALSE   |
| 91d6bece60976a50b9051eaa4bf40ad9  | 1   | NA                | FALSE   |
| 41916132a0320d7898614ab3368c5217  | 1   | NA                | FALSE   |
| 8811d5912a35b66ddd56a85f2f84756f  | 1   | NA                | FALSE   |
| 061cc3fd68a078dfc17c89dd4e7c1d57  | 1   | NA                | FALSE   |
| f5b36d223324383df303174975ce46d5  | 1   | NA                | FALSE   |
| 36bb4e0630608c32e7b2a4b043c399c1  | 1   | NA                | FALSE   |
| 0984365862e8b81ae110762355cd5356  | 1   | NA                | FALSE   |
| 59f71f034d6f5f3211ce16437c08a399  | 1   | NA                | FALSE   |
| 8dcdc18ee9b372e12ad9acf3b560f0de  | 1   | NA                | FALSE   |
| f42582c91ba40de887b64d7b2356d6d8  | 1   | NA                | FALSE   |
| dbd6a52a5c2d8dd052e383c067109d73  | 1   | NA                | FALSE   |
| 3540e1ab31453e650aed7b1c16c68373  | 1   | NA                | FALSE   |
| ae37473e32867acb33cd941ca2a0bc9f  | 1   | NA                | FALSE   |
| 6639175de58b5f0ee31f8300c07adc72  | 1   | NA                | FALSE   |
| 8cf34b55c0736c2a6e94f72fd0aa07e1  | 1   | NA                | FALSE   |
| 408f662e9702a6252066a482053dfa05  | 1   | NA                | FALSE   |
| 0556309e565282e3cdc6d22c7a1314ca  | 1   | NA                | FALSE   |
| a31397646d05a84f8890b670601c2a88  | 1   | NA                | FALSE   |
| c6e6c1884afc6be4ad05add5399cc95e  | 1   | NA                | FALSE   |
| 1e3ca86e4fa19f2b96529f8a78b6304a  | 1   | NA                | FALSE   |
| 90a7ad77ba874fb1ad37e15e4defbb91  | 1   | NA                | FALSE   |
| 6e0436014e7f545bb0c89cf90bf2c82   | 1   | NA                | FALSE   |
| 1488392be87091b8779262c95753d489  | 1   | NA                | FALSE   |

|                                  |   |    |       |
|----------------------------------|---|----|-------|
| 71a639b66d4d99791d5c69e649932498 | 1 | NA | FALSE |
| b90a3f4af43dd1eadaac36033d825b32 | 1 | NA | FALSE |
| 7c085dcaa22450a60d0bcdf9c02f1d   | 1 | NA | FALSE |
| 7615b39e73064bf612abefe1336a5f5e | 1 | NA | FALSE |
| 0cf91d09851e5165515a95c48f990b2c | 1 | NA | FALSE |
| 40ef360e3de9eef2e54cc384c0f442fb | 1 | NA | FALSE |
| c9d2e62830d879d1b703ec112804ed4f | 1 | NA | FALSE |
| 179dfc0f76a5c60ed0db3f36ea4103d5 | 1 | NA | FALSE |
| 59bbb81117691ae8817ac815f73b9945 | 1 | NA | FALSE |
| 27cee38f3d317da09942584a9e611701 | 1 | NA | FALSE |
| a344d280d5637fa174318df87463e8b2 | 1 | NA | FALSE |
| 1abf91747a161b143a6733473add3d1f | 1 | NA | FALSE |
| 58172f93459801cf780471559743a1a1 | 1 | NA | FALSE |
| 2dbe816b5bd581af1d9e40b426a3ccc5 | 1 | NA | FALSE |
| ad213ddb834c49ba5c3fb2c35715ea31 | 1 | NA | FALSE |
| f4759806bae7e262721beb08f96af6f2 | 1 | NA | FALSE |
| 9f6cc04b4b011455a72b5a60460c23   | 1 | NA | FALSE |
| c3a7e5679db8cc9a7dcb122d21a62abd | 1 | NA | FALSE |
| 99655509650822e576d12e2203109953 | 1 | NA | FALSE |
| c4a5fa167be7022d7e8f6a24ea5a814e | 1 | NA | FALSE |
| a75568deb408dcc5be74bdf23e1f6dc7 | 1 | NA | FALSE |
| 6ac5bf8ed56c7709a77fc026615798ad | 1 | NA | FALSE |
| 324760267b2fe263a0c835e9af329c00 | 1 | NA | FALSE |
| 6f5e0038f0b835752a599ff8ec9801ea | 1 | NA | FALSE |
| 88d21bdf6bb7dd539b1f97ef3fd3d11  | 1 | NA | FALSE |
| 7148747d2d38f0d895386df0c931dcb4 | 1 | NA | FALSE |
| fa50250efdc5d41bd6577db321412f03 | 1 | NA | FALSE |
| 8d97a06ddc80deb17af3ed88f954f8e1 | 1 | NA | FALSE |
| f68c7cd7566c0f1295c0e531c09b5c1f | 1 | NA | FALSE |
| 8c3070a01c5d1017b27e2dac97270d05 | 1 | NA | FALSE |
| 7425d153990b97e5f0e131d3cad5aa4  | 1 | NA | FALSE |
| c1d232ebefcae769cf656b0931cd11a  | 1 | NA | FALSE |
| 7591056a10b3bd4cc962154330349ef  | 1 | NA | FALSE |
| 20c1ba0382813ccc891453a727f45d2d | 1 | NA | FALSE |
| ced6caa0b6c0ffc98a8414b5bdc83112 | 1 | NA | FALSE |
| 3f1c0b87de5bb4df2b8d2e6b36bed0ab | 1 | NA | FALSE |
| f6799ce3e138384ebd9119e29709a3f3 | 1 | NA | FALSE |
| 855b88b34ea95ec7b5c3de4ad4c824ee | 1 | NA | FALSE |
| 30adb700aa2336a724166e014d162e7f | 1 | NA | FALSE |
| 5cd044dfb5feca3ee72dae76fa6e9ee9 | 1 | NA | FALSE |
| 5e6f632ca87cf43563b74e15539e7785 | 1 | NA | FALSE |
| bd96e429d73d57cbb9c8ef9bc46b7820 | 1 | NA | FALSE |
| 65e2fe387bdf0fa880811cceac1d59e  | 1 | NA | FALSE |
| 5a14b8ff1aecd0489c6820e8e105b88  | 1 | NA | FALSE |
| ef5a2480e5d717d0c565e287f82a473  | 1 | NA | FALSE |
| 9ae9c5171312ae7ce382a7baa6b81362 | 1 | NA | FALSE |
| 0911bb8210812727927796066a861651 | 1 | NA | FALSE |
| 85a7a2746dba46cd60d893ad0b3d35f  | 1 | NA | FALSE |
| 3114f9c7de279de58fe3dc15e2dd14fb | 1 | NA | FALSE |
| b4bee6fb68e88d00ba80c1bc627510c0 | 1 | NA | FALSE |
| 12679b50e6d1202949122b8b0622ade1 | 1 | NA | FALSE |
| 9f2cf0e7035d0f777c21936203005b14 | 1 | NA | FALSE |
| 394c2ec9cae1af76e0b585fedac13a2  | 1 | NA | FALSE |
| 8bedbd900998bc8be0f4e32027c14b79 | 1 | NA | FALSE |
| d91b9586180e2dc67db8d50bfc06d00c | 1 | NA | FALSE |
| 9ae3e5447f15b13586d0d3803b8e68af | 1 | NA | FALSE |
| e50354b9c4d97287a20c1e167dfefa3e | 1 | NA | FALSE |
| ba76aae4914cd1c68039931188d050fe | 1 | NA | FALSE |
| 03b679010b1bf8b116785f42667e02e1 | 1 | NA | FALSE |
| e7eb03a5b2a368b8a6099d242bcacd54 | 1 | NA | FALSE |
| 945f64283b2eba0afa876de55b78ef31 | 1 | NA | FALSE |
| c686148b8d01f84f7604bc5fcaddbebd | 1 | NA | FALSE |
| 0407fd8be2c9084dafdf0c2cd3d0befa | 1 | NA | FALSE |
| 8d2de3aea083cf47d1eae80c2af9146  | 1 | NA | FALSE |
| 3e23230e4686b96576316f5e033b7082 | 1 | NA | FALSE |
| 6e7e1fbac8c5e839a9cdfc5fba8f7770 | 1 | NA | FALSE |
| 7b3fa6d9e1062f0b6537b7372012b859 | 1 | NA | FALSE |
| d19aea26e0ad7c2155fdd287a2ec6b77 | 1 | NA | FALSE |
| Oca49b13050f305492d115000a1d001d | 1 | NA | FALSE |
| 2b9cede5145c126ca5a5de9fc895a14b | 1 | NA | FALSE |
| 1a902f04710149ed9498c3e99a5afd63 | 1 | NA | FALSE |
| 8577af56ac1b94a1aa8b74077b5a5cbc | 1 | NA | FALSE |
| bd1a351302ec362f46db2979bada621d | 1 | NA | FALSE |
| 352144a7596df7857029b20703ae2eda | 1 | NA | FALSE |
| 5c3c19675e638054dd3325e5ba5677d2 | 1 | NA | FALSE |
| 15d139a08d6c1648ba4c20c9995ab9b2 | 1 | NA | FALSE |
| 2ca106d719b5911c71a6e189459efa66 | 1 | NA | FALSE |
| 845f586ce16f4bd61ab41379809ae1e7 | 1 | NA | FALSE |
| 72b07965cf4f08eff549d0053d0906f1 | 1 | NA | FALSE |
| 1b336d762092361e9f7c04a56548a6a2 | 1 | NA | FALSE |
| 2429b0edc950114d01dded0d631166cd | 1 | NA | FALSE |
| 3f839cccd6e9568fcb569b0e4f7d6ee8 | 1 | NA | FALSE |

|                                  |      |       |
|----------------------------------|------|-------|
| 1c0e84ab16636a5d983a7f210354520b | 1 NA | FALSE |
| f7163bb266bce765f0aa145cf7a6c37f | 1 NA | FALSE |
| 6fd9843eb698930e30818d77d505ed5c | 1 NA | FALSE |
| 94b612176f3b4cea22cda2f67134ebe6 | 1 NA | FALSE |
| 25ddb3b811c0140bec907e45cf4b2a45 | 1 NA | FALSE |
| 68f55b94cf23a2b444b7c8929907eb7f | 1 NA | FALSE |
| 97f006e854e73edfcec1415ac23de6d  | 1 NA | FALSE |
| 8171a8faf564215283a3fccfe23a4026 | 1 NA | FALSE |
| 3eac2f1f0d1c5a98e4dcfe3bb7c16709 | 1 NA | FALSE |
| 832fadfb5fe2b9bec572b5788cfb3f73 | 1 NA | FALSE |
| 7a538dcb40656b6be4c267503c501b0a | 1 NA | FALSE |
| 4e4b6a3260a6061be4590ed7fd29a214 | 1 NA | FALSE |
| 5ed7d64c93da6dfb32f43400d14ca8e3 | 1 NA | FALSE |
| 3e92de515639a37692e35e261af54e98 | 1 NA | FALSE |
| 1848ba16ac6e038d4be98fd5d7bfead2 | 1 NA | FALSE |
| bb5e5ae0efa9bf009dd646ebcac3bab4 | 1 NA | FALSE |
| 703968088ed15033df6c62f2530e50b3 | 1 NA | FALSE |
| 62107a3ffb0f00ff881660f970e449   | 1 NA | FALSE |
| d3f91dd2f8e03e272362cb77276b159c | 1 NA | FALSE |
| 37e1ba9d0783625524befd620d1e3d29 | 1 NA | FALSE |
| 3d6c6053fcc0b58354ac9dbe2d2f699e | 1 NA | FALSE |
